# Supplementary material for: TFIIH-p52ΔC defines a ninth xeroderma pigmentosum complementation–group XP-J and restores TFIIH stability to p8-defective trichothiodystrophy
Source: JCI journal article supplement (doi:10.1172/jci195732), 2025-09-09

Fig1 c

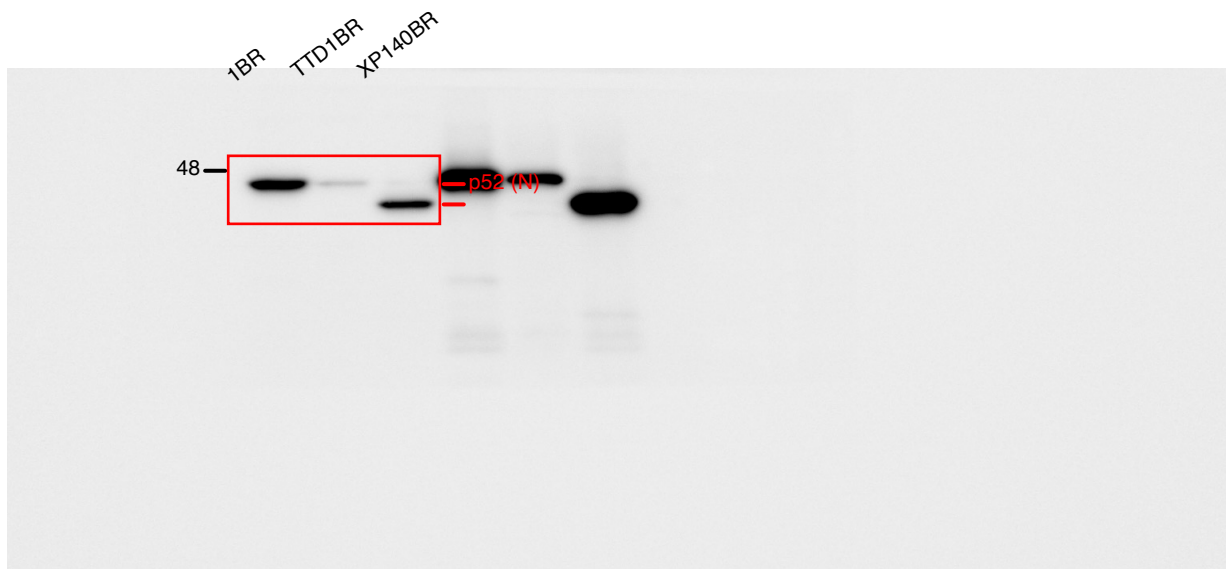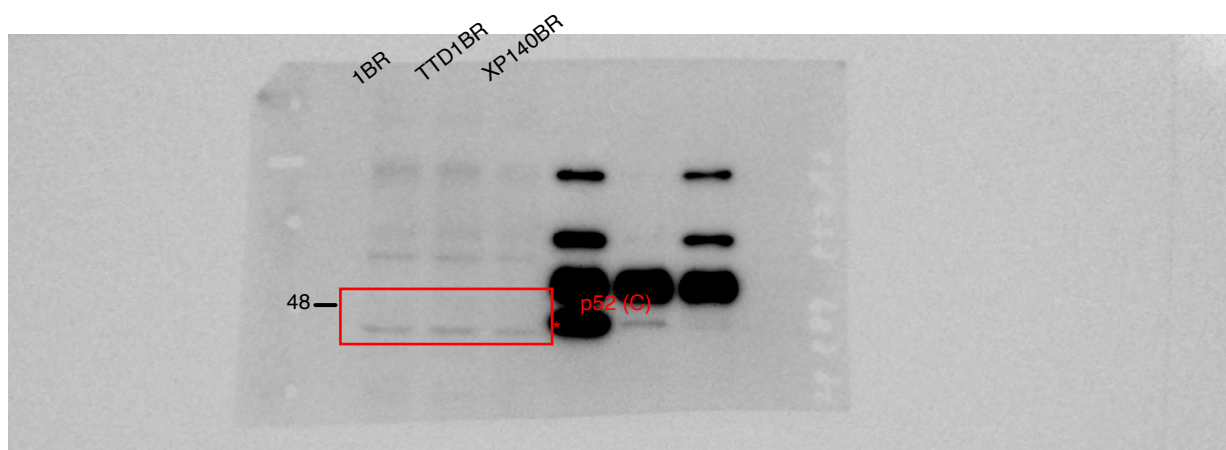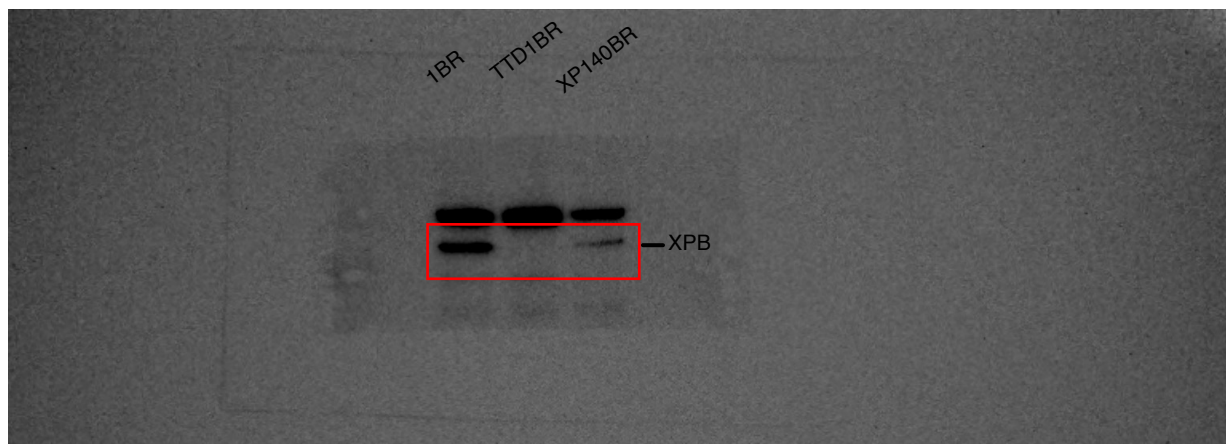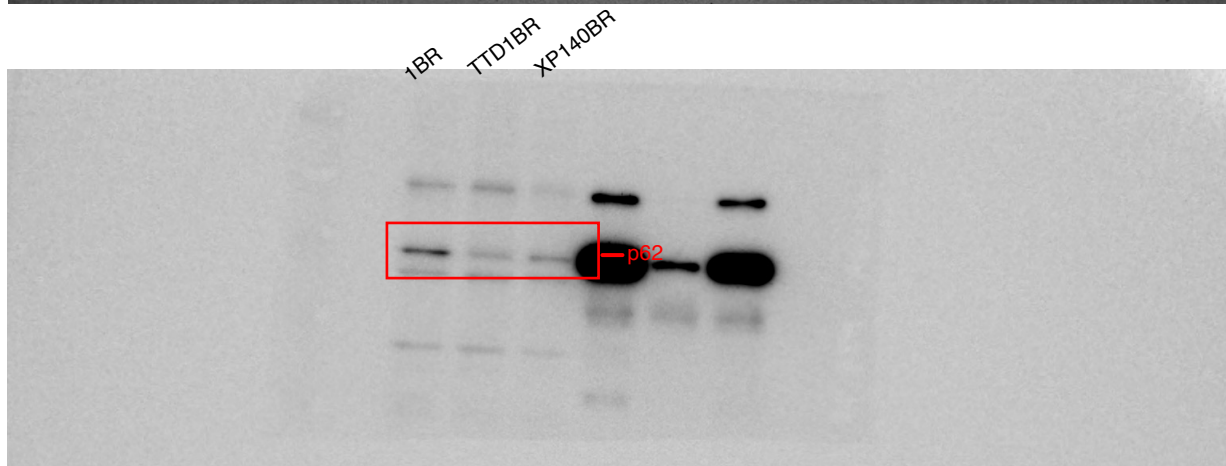

Fig1 c

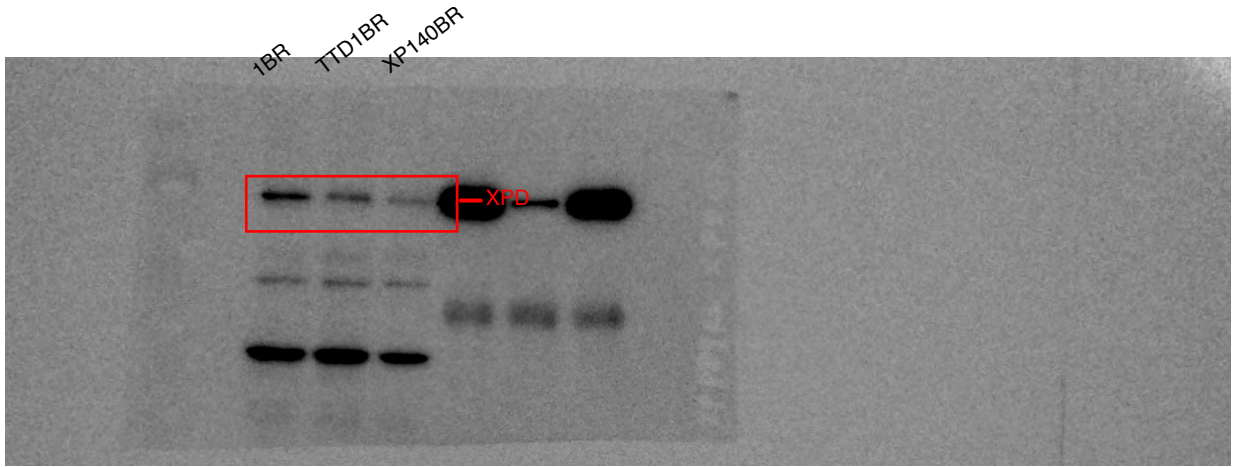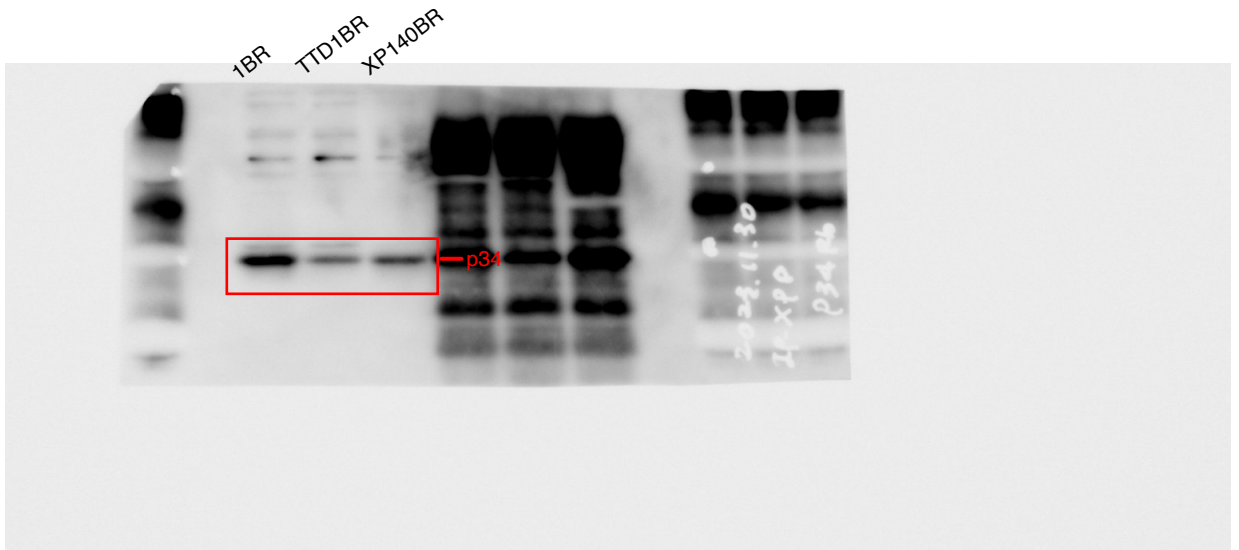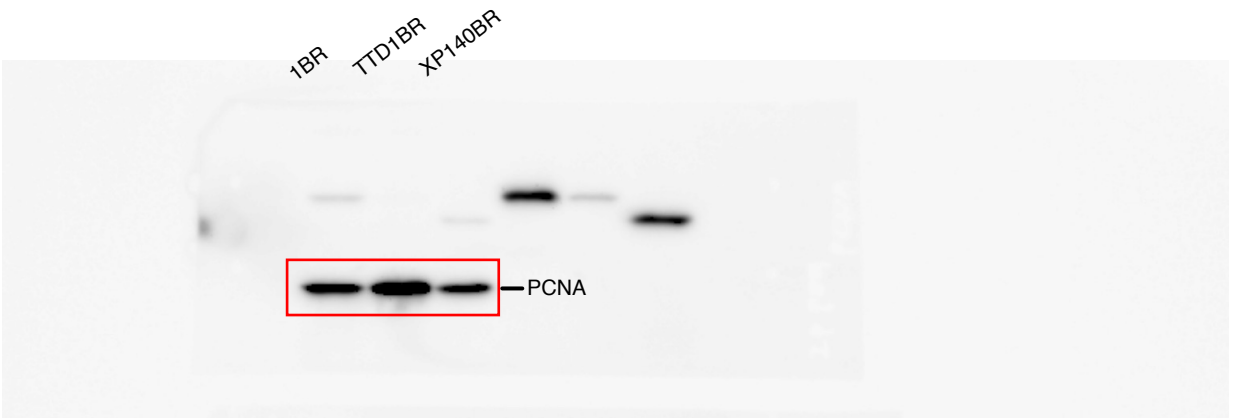

Fig2 a

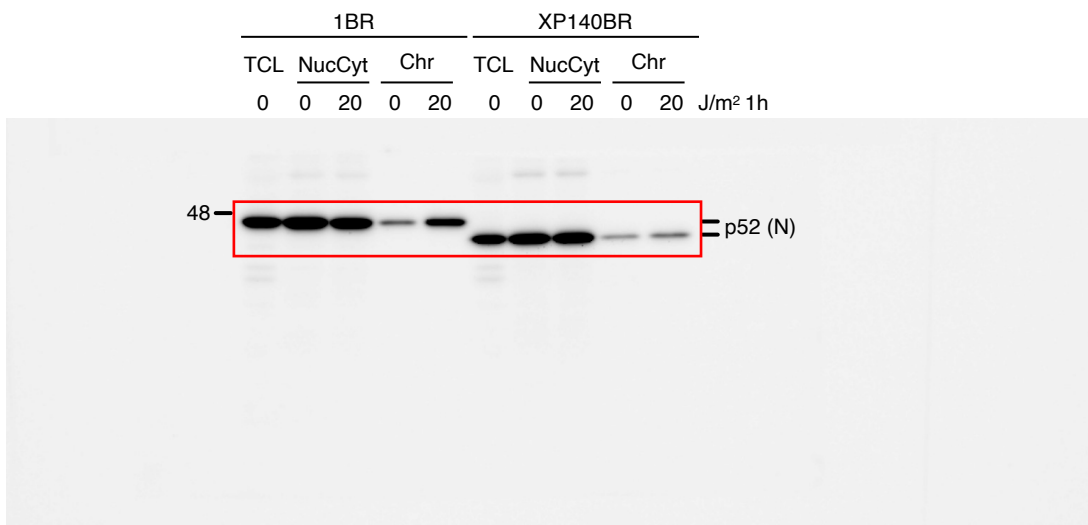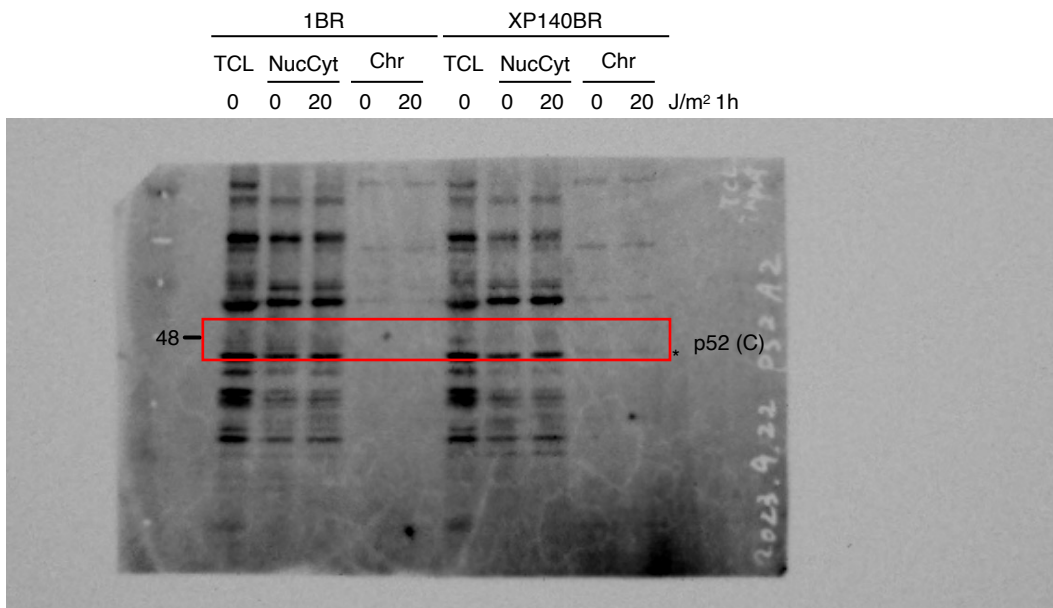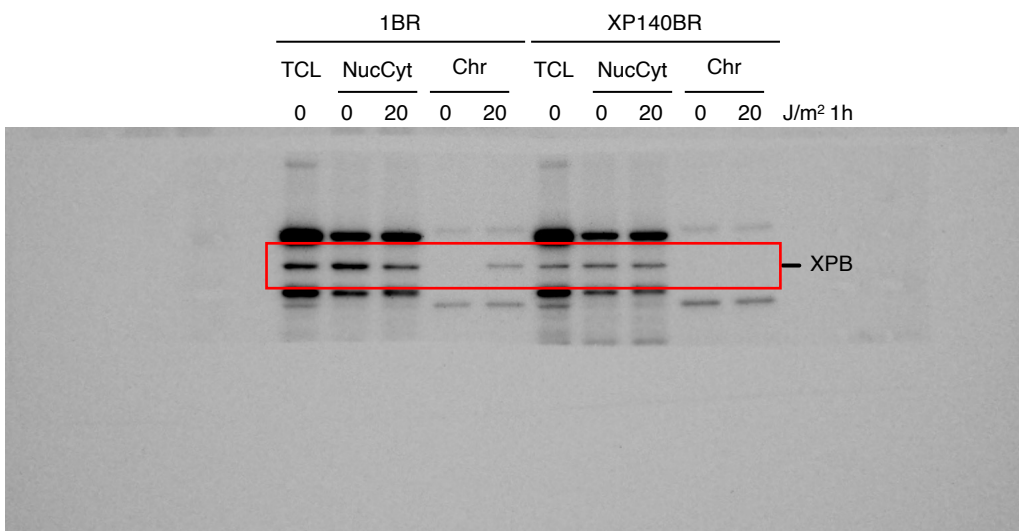

Fig2 a

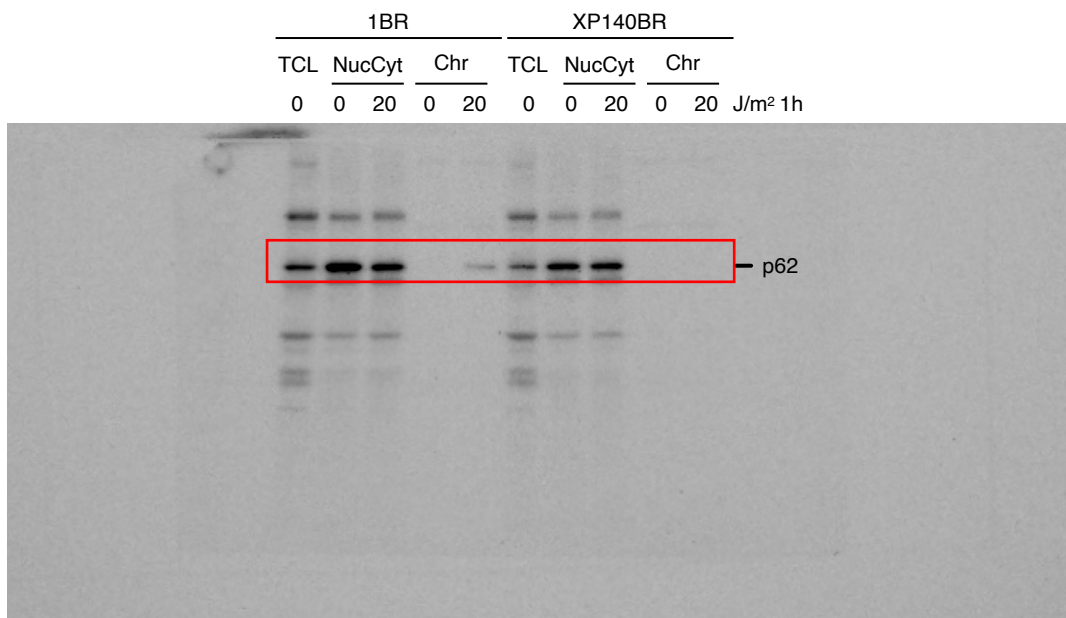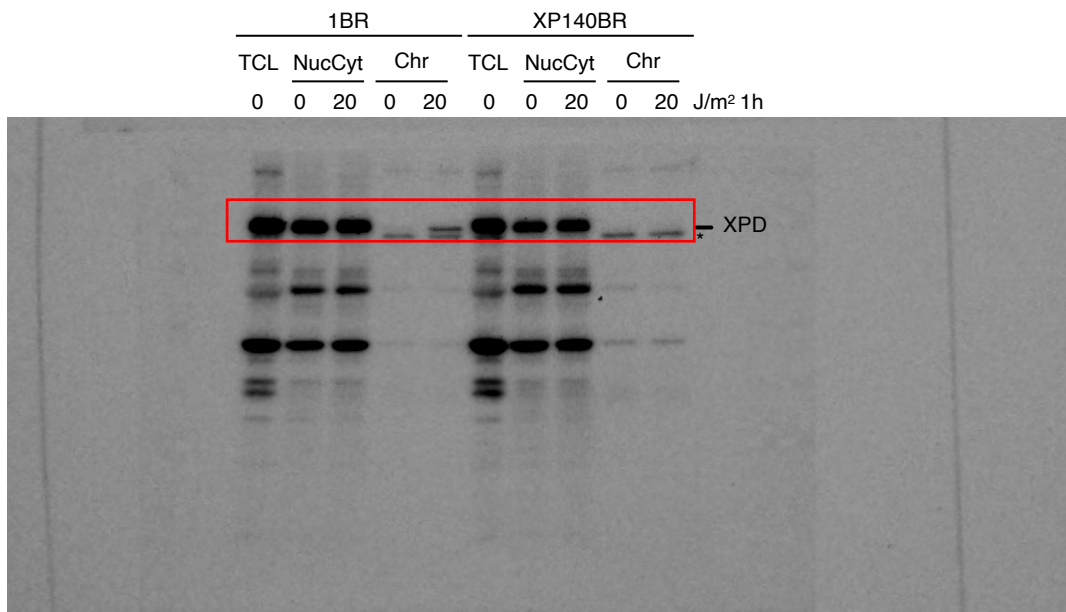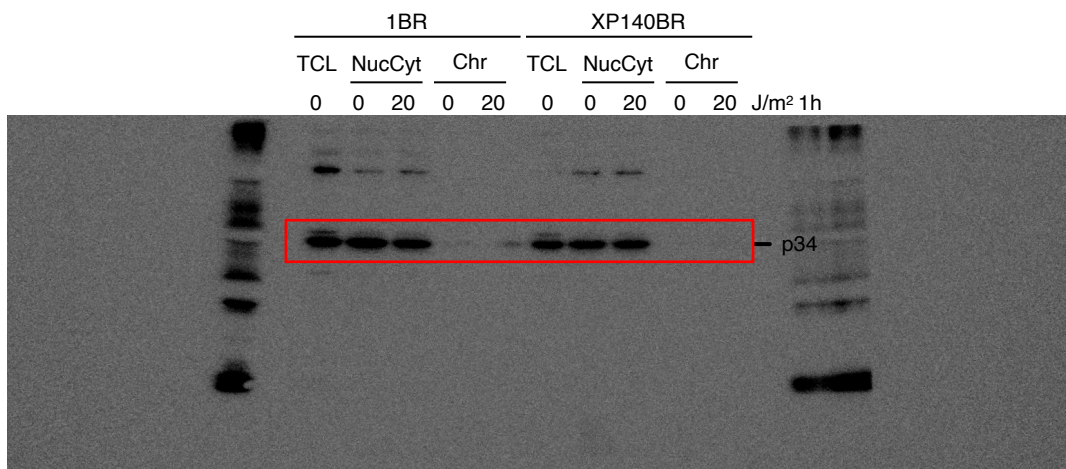

Fig2 a

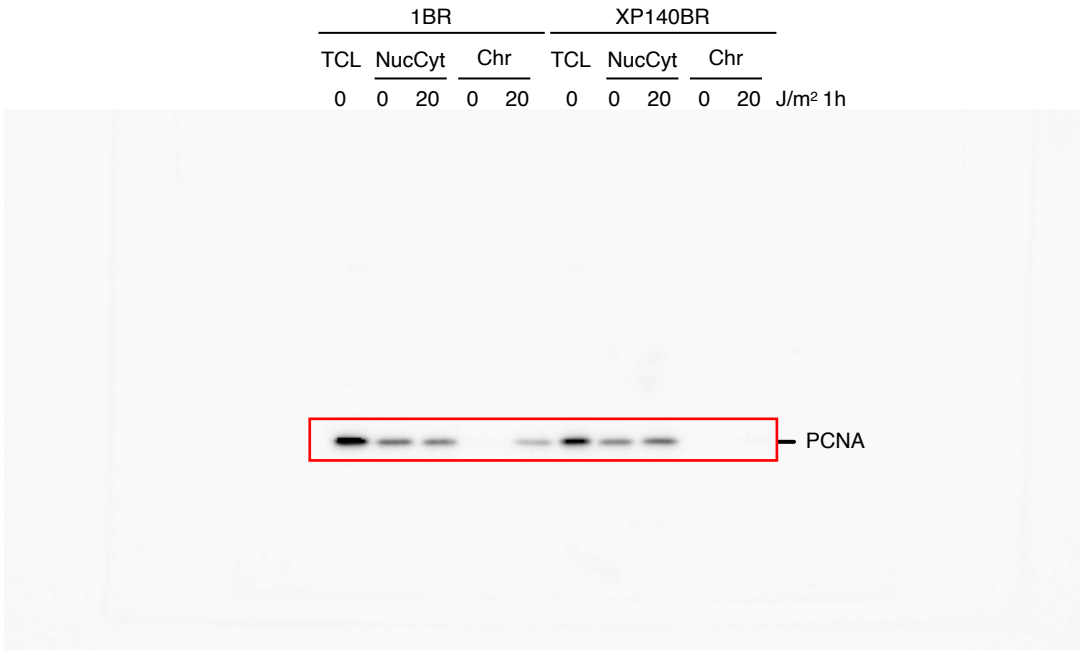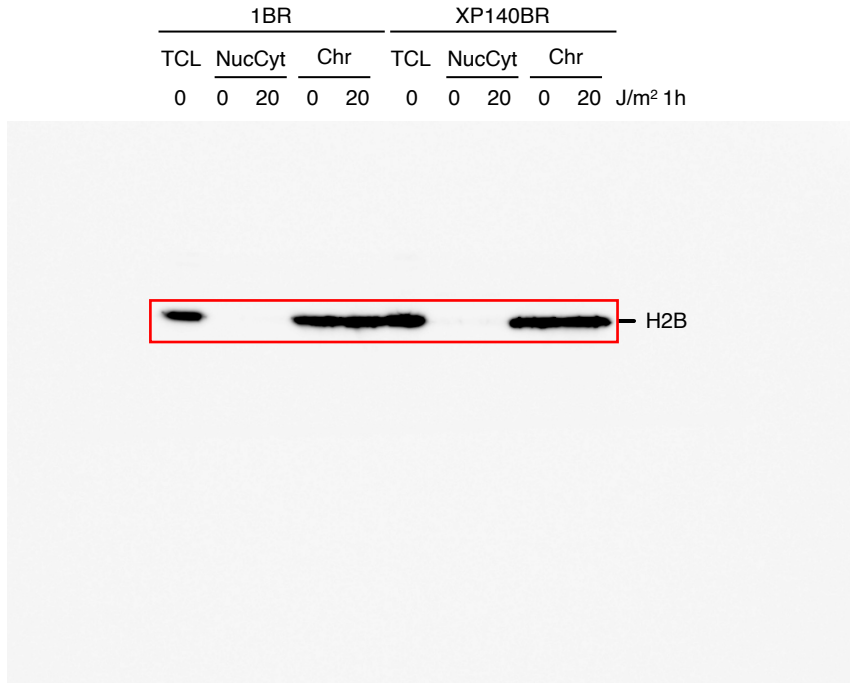

Fig2 b

| IP: XPB             |    |     |    |         |    |     |    |
|---------------------|----|-----|----|---------|----|-----|----|
| 1BR                 |    |     |    | XP140BR |    |     |    |
| NucCyt              |    | Chr |    | NucCyt  |    | Chr |    |
| 0                   | 20 | 0   | 20 | 0       | 20 | 0   | 20 |
| J/m <sup>2</sup> 1h |    |     |    |         |    |     |    |

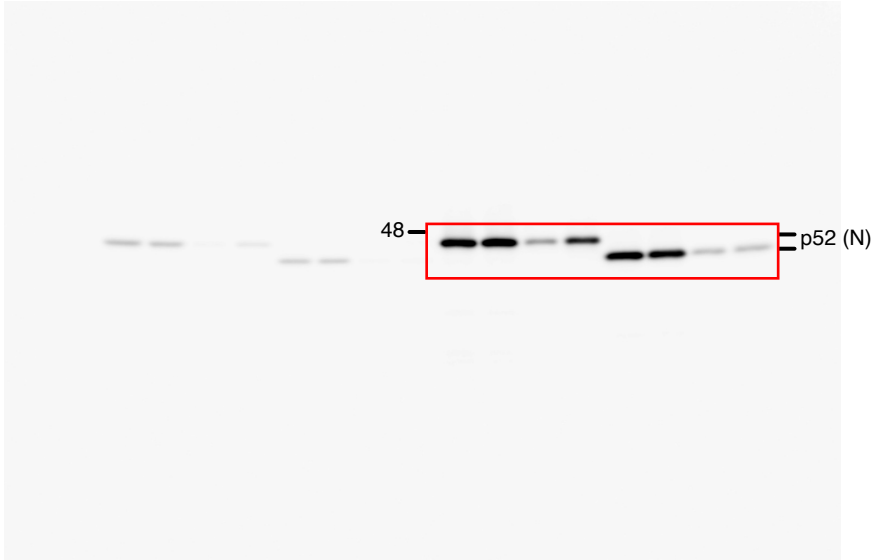

| IP: XPB             |    |     |    |         |    |     |    |
|---------------------|----|-----|----|---------|----|-----|----|
| 1BR                 |    |     |    | XP140BR |    |     |    |
| NucCyt              |    | Chr |    | NucCyt  |    | Chr |    |
| 0                   | 20 | 0   | 20 | 0       | 20 | 0   | 20 |
| J/m <sup>2</sup> 1h |    |     |    |         |    |     |    |

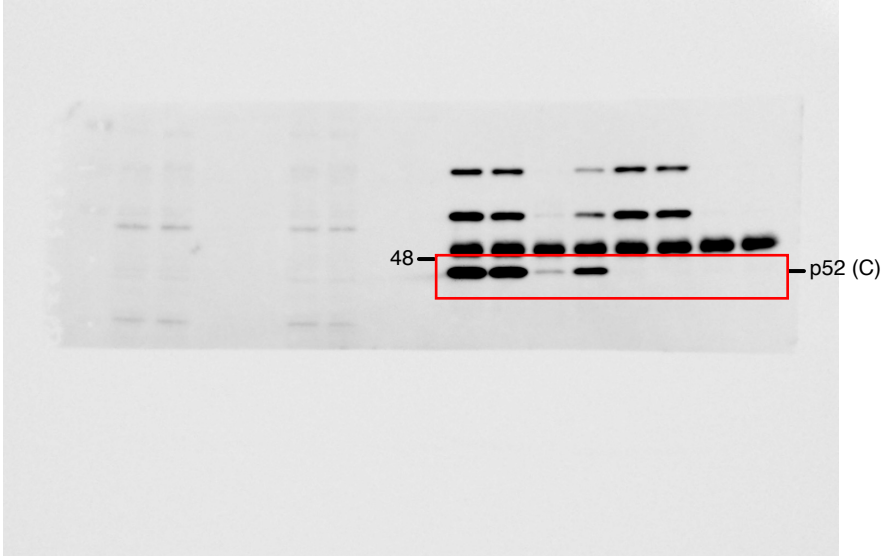

| IP: XPB             |    |     |    |         |    |     |    |
|---------------------|----|-----|----|---------|----|-----|----|
| 1BR                 |    |     |    | XP140BR |    |     |    |
| NucCyt              |    | Chr |    | NucCyt  |    | Chr |    |
| 0                   | 20 | 0   | 20 | 0       | 20 | 0   | 20 |
| J/m <sup>2</sup> 1h |    |     |    |         |    |     |    |

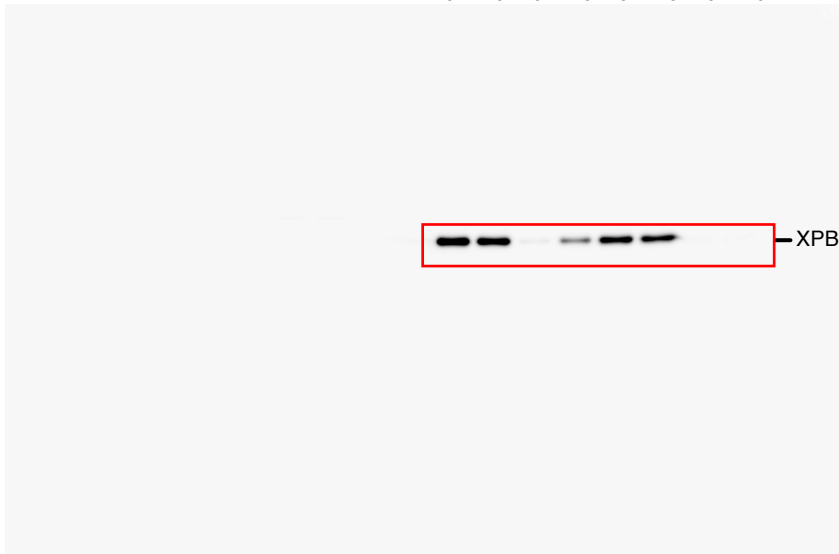

Fig2 b

IP: XPB

| 1BR    |     | XP140BR |     |   |    |   |    |
|--------|-----|---------|-----|---|----|---|----|
| NucCyt | Chr | NucCyt  | Chr |   |    |   |    |
| 0      | 20  | 0       | 20  | 0 | 20 | 0 | 20 |

J/m<sup>2</sup> 1h

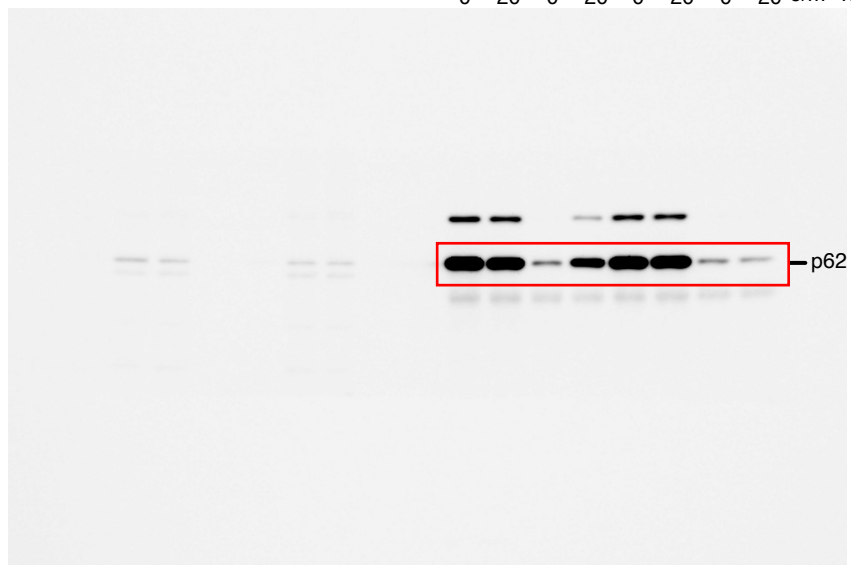

IP: XPB

| 1BR    |     | XP140BR |     |   |    |   |    |
|--------|-----|---------|-----|---|----|---|----|
| NucCyt | Chr | NucCyt  | Chr |   |    |   |    |
| 0      | 20  | 0       | 20  | 0 | 20 | 0 | 20 |

J/m<sup>2</sup> 1h

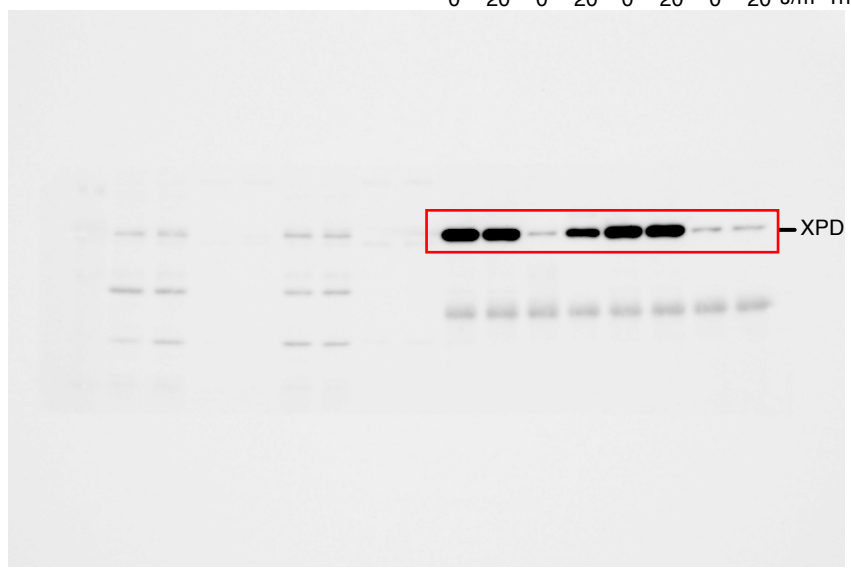

IP: XPB

| 1BR    |     | XP140BR |     |   |    |   |    |
|--------|-----|---------|-----|---|----|---|----|
| NucCyt | Chr | NucCyt  | Chr |   |    |   |    |
| 0      | 20  | 0       | 20  | 0 | 20 | 0 | 20 |

J/m<sup>2</sup> 1h

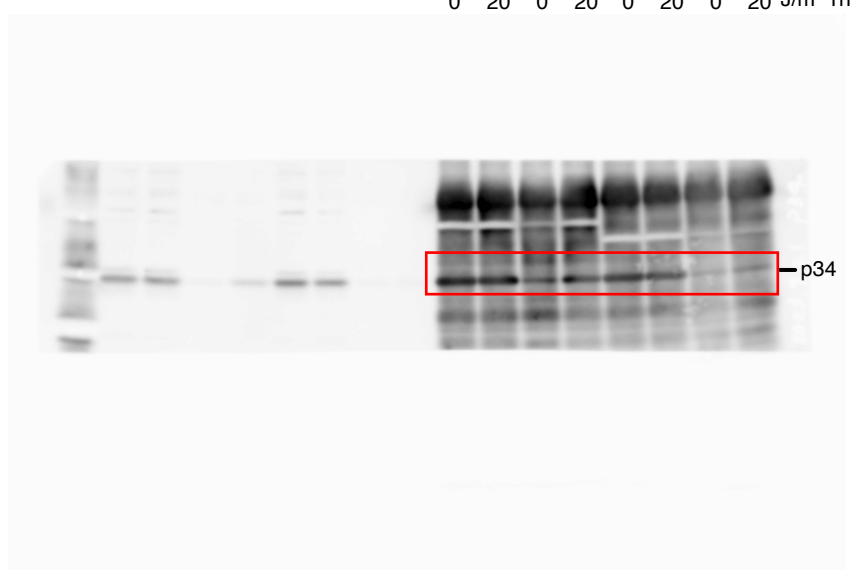

Fig2 c

| IP: XPD             |    |     |    |         |    |     |    |
|---------------------|----|-----|----|---------|----|-----|----|
| 1BR                 |    |     |    | XP140BR |    |     |    |
| NucCyt              |    | Chr |    | NucCyt  |    | Chr |    |
| 0                   | 20 | 0   | 20 | 0       | 20 | 0   | 20 |
| J/m <sup>2</sup> 1h |    |     |    |         |    |     |    |

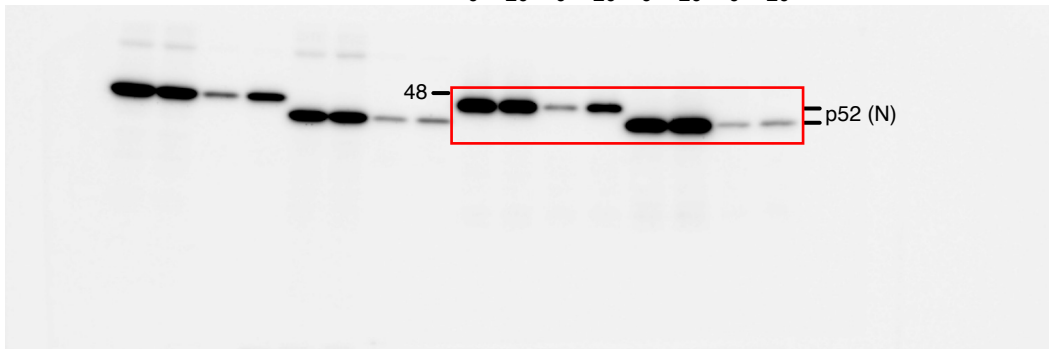

| IP: XPD             |    |     |    |         |    |     |    |
|---------------------|----|-----|----|---------|----|-----|----|
| 1BR                 |    |     |    | XP140BR |    |     |    |
| NucCyt              |    | Chr |    | NucCyt  |    | Chr |    |
| 0                   | 20 | 0   | 20 | 0       | 20 | 0   | 20 |
| J/m <sup>2</sup> 1h |    |     |    |         |    |     |    |

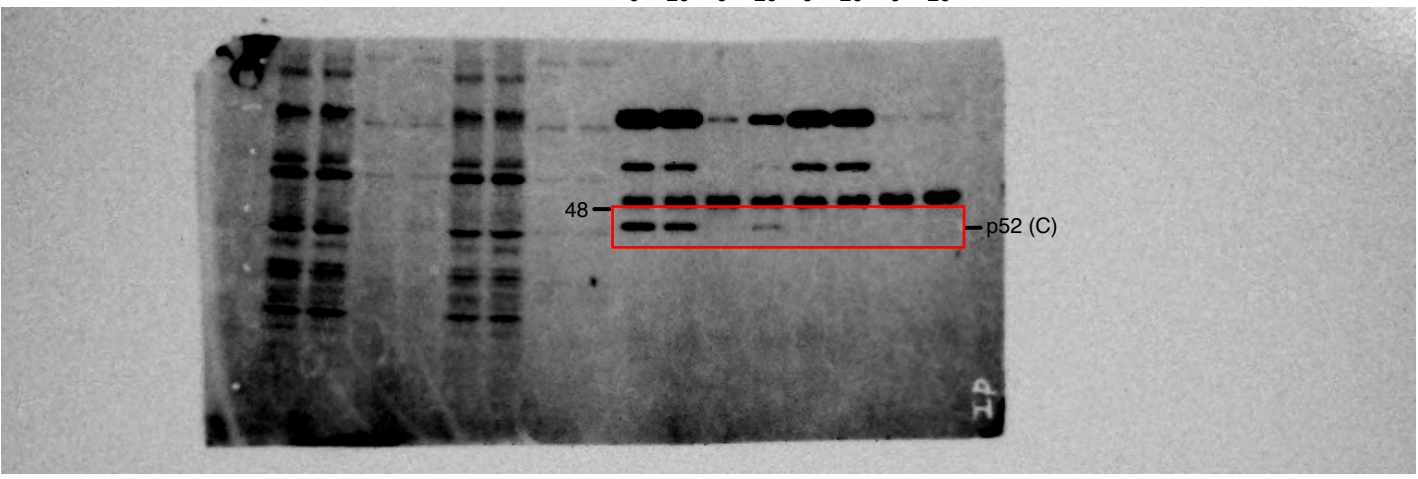

| IP: XPD             |    |     |    |         |    |     |    |
|---------------------|----|-----|----|---------|----|-----|----|
| 1BR                 |    |     |    | XP140BR |    |     |    |
| NucCyt              |    | Chr |    | NucCyt  |    | Chr |    |
| 0                   | 20 | 0   | 20 | 0       | 20 | 0   | 20 |
| J/m <sup>2</sup> 1h |    |     |    |         |    |     |    |

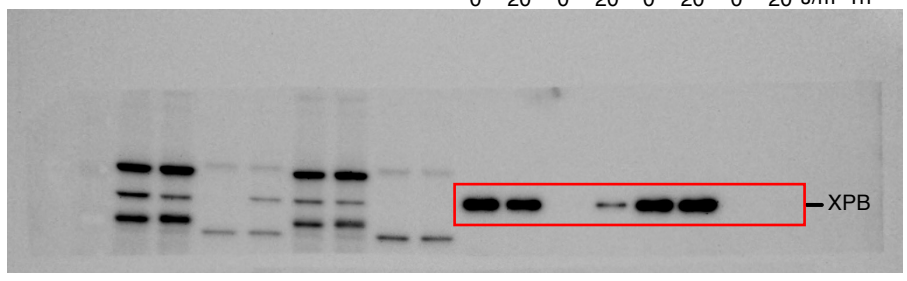

Fig2 c

IP: XPD

| 1BR    |     | XP140BR |     |   |    |   |    |
|--------|-----|---------|-----|---|----|---|----|
| NucCyt | Chr | NucCyt  | Chr |   |    |   |    |
| 0      | 20  | 0       | 20  | 0 | 20 | 0 | 20 |

J/m<sup>2</sup> 1h

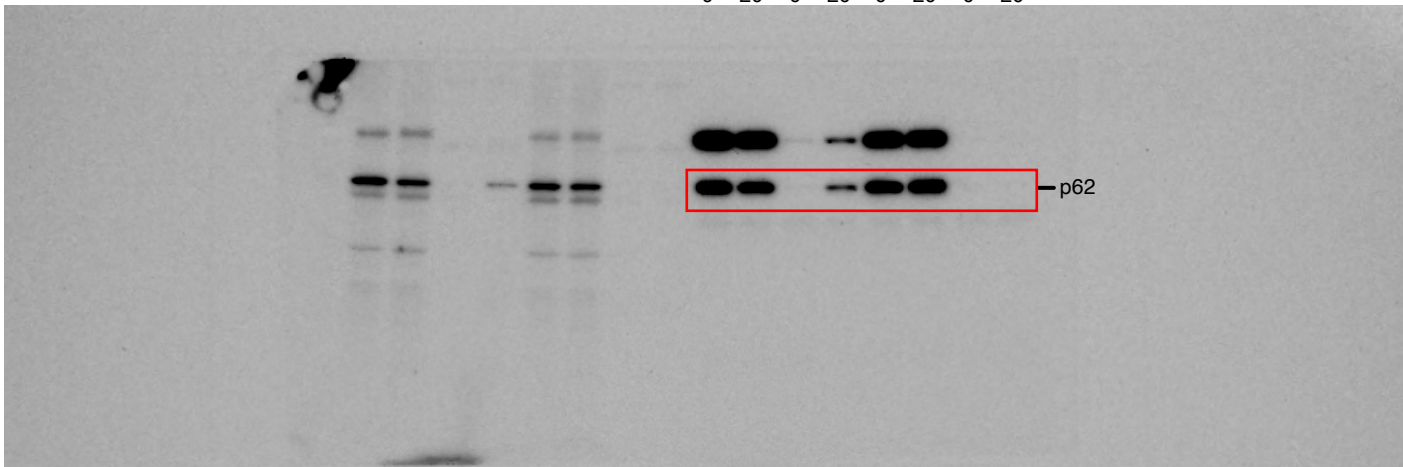

IP: XPD

| 1BR    |     | XP140BR |     |   |    |   |    |
|--------|-----|---------|-----|---|----|---|----|
| NucCyt | Chr | NucCyt  | Chr |   |    |   |    |
| 0      | 20  | 0       | 20  | 0 | 20 | 0 | 20 |

J/m<sup>2</sup> 1h

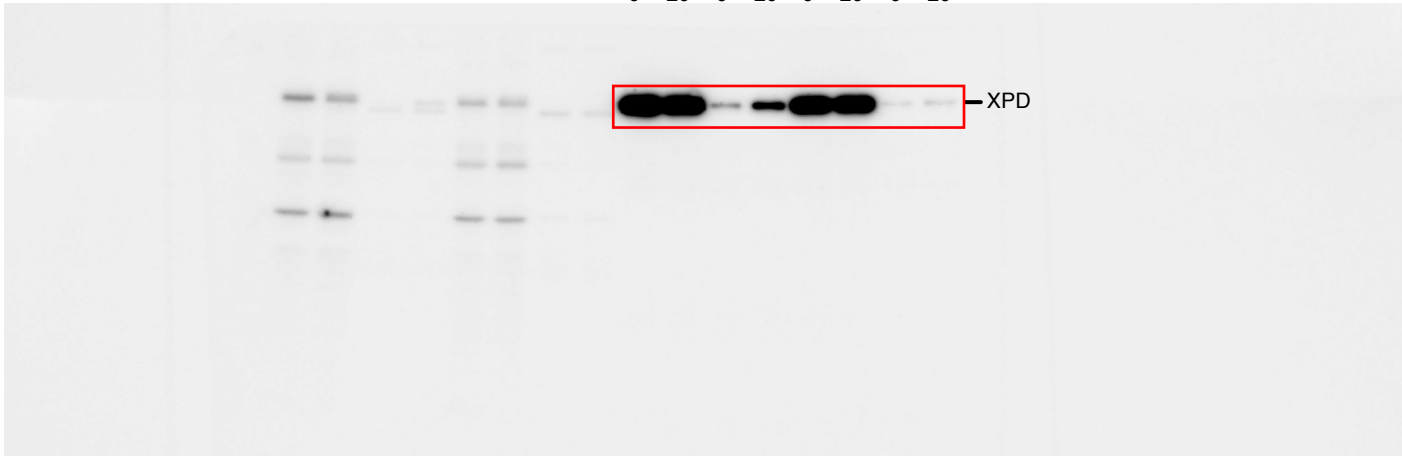

IP: XPD

| 1BR    |     | XP140BR |     |   |    |   |    |
|--------|-----|---------|-----|---|----|---|----|
| NucCyt | Chr | NucCyt  | Chr |   |    |   |    |
| 0      | 20  | 0       | 20  | 0 | 20 | 0 | 20 |

J/m<sup>2</sup> 1h

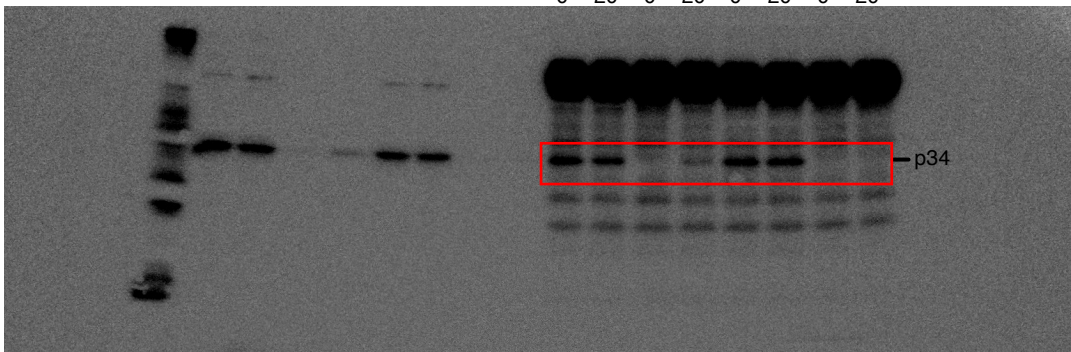

Fig2 d

IP: p62

| 1BR    |     | XP140BR |     |   |    |   |    |
|--------|-----|---------|-----|---|----|---|----|
| NucCyt | Chr | NucCyt  | Chr |   |    |   |    |
| 0      | 20  | 0       | 20  | 0 | 20 | 0 | 20 |

J/m<sup>2</sup> 1h

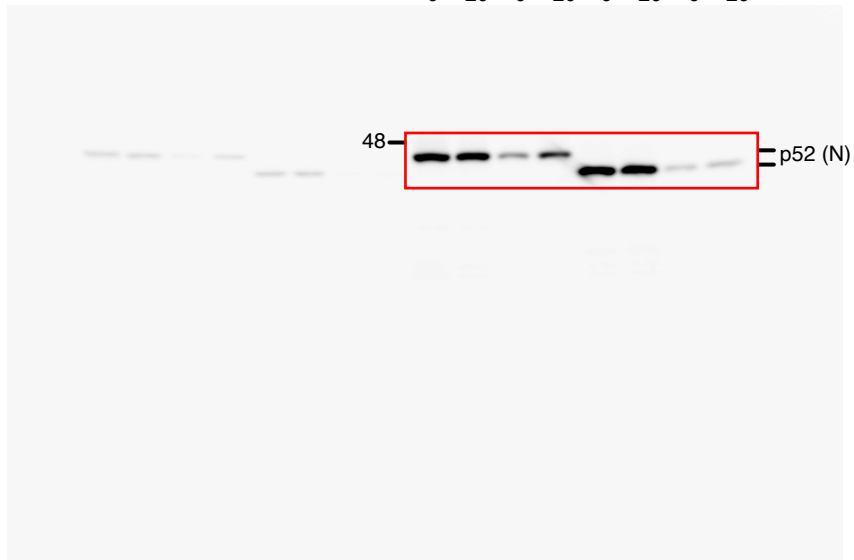

IP: p62

| 1BR    |     | XP140BR |     |   |    |   |    |
|--------|-----|---------|-----|---|----|---|----|
| NucCyt | Chr | NucCyt  | Chr |   |    |   |    |
| 0      | 20  | 0       | 20  | 0 | 20 | 0 | 20 |

J/m<sup>2</sup> 1h

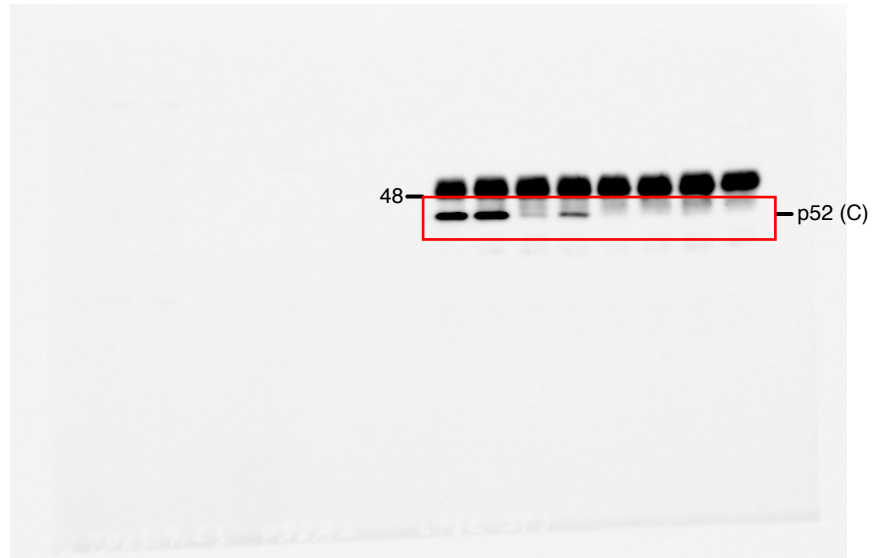

IP: p62

| 1BR    |     | XP140BR |     |   |    |   |    |
|--------|-----|---------|-----|---|----|---|----|
| NucCyt | Chr | NucCyt  | Chr |   |    |   |    |
| 0      | 20  | 0       | 20  | 0 | 20 | 0 | 20 |

J/m<sup>2</sup> 1h

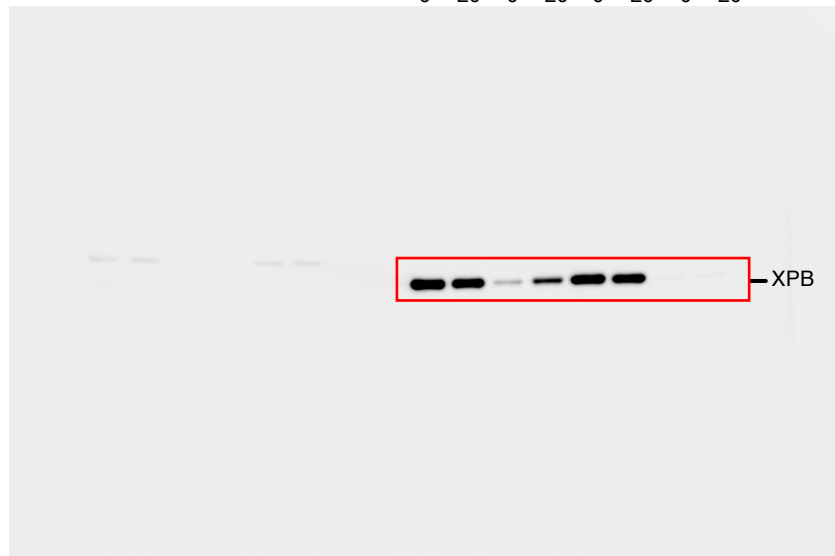

Fig2 d

IP: p62

| 1BR    |     | XP140BR |     |   |    |   |    |
|--------|-----|---------|-----|---|----|---|----|
| NucCyt | Chr | NucCyt  | Chr |   |    |   |    |
| 0      | 20  | 0       | 20  | 0 | 20 | 0 | 20 |

J/m<sup>2</sup> 1h

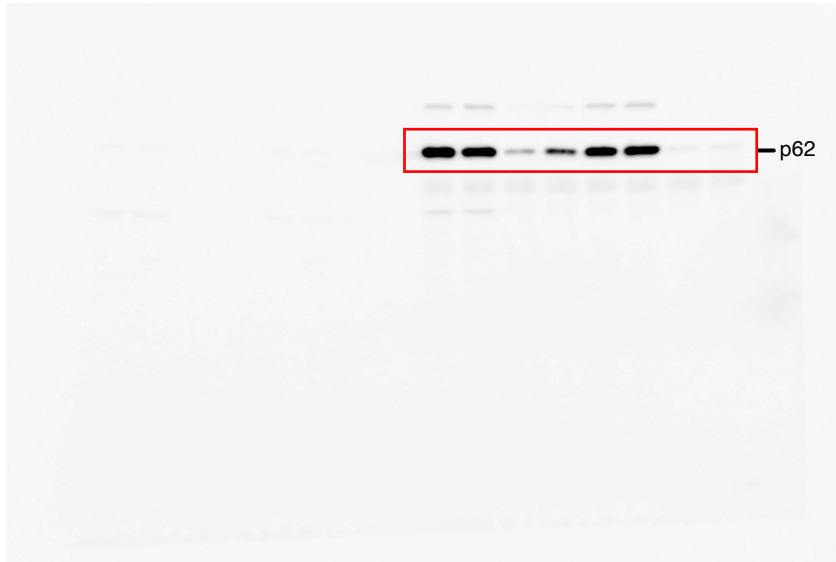

IP: p62

| 1BR    |     | XP140BR |     |   |    |   |    |
|--------|-----|---------|-----|---|----|---|----|
| NucCyt | Chr | NucCyt  | Chr |   |    |   |    |
| 0      | 20  | 0       | 20  | 0 | 20 | 0 | 20 |

J/m<sup>2</sup> 1h

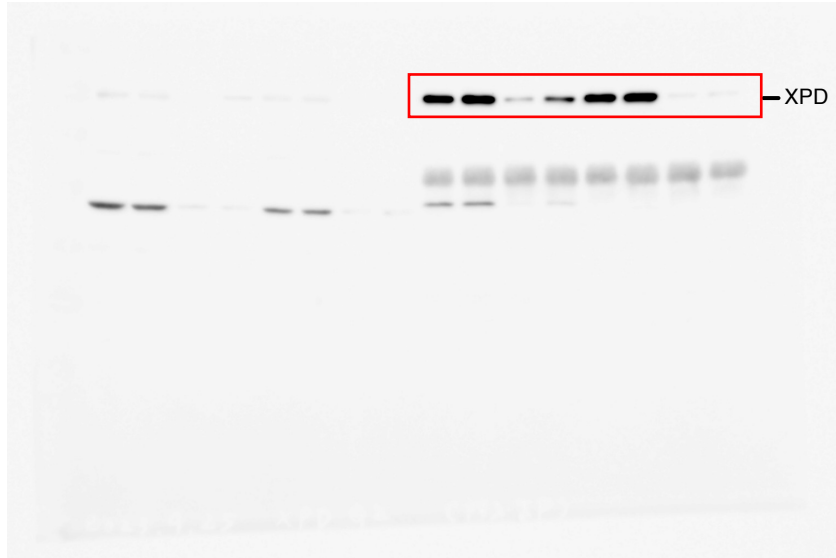

IP: p62

| 1BR    |     | XP140BR |     |   |    |   |    |
|--------|-----|---------|-----|---|----|---|----|
| NucCyt | Chr | NucCyt  | Chr |   |    |   |    |
| 0      | 20  | 0       | 20  | 0 | 20 | 0 | 20 |

J/m<sup>2</sup> 1h

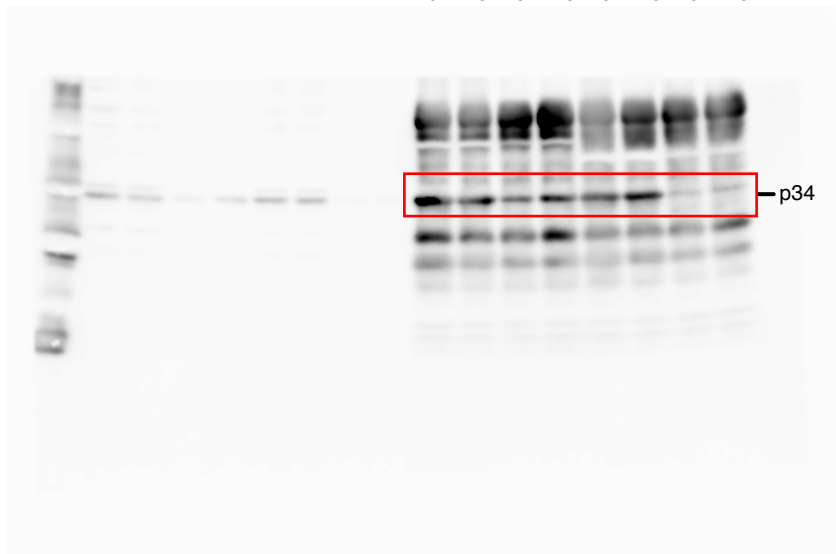

Fig2 e

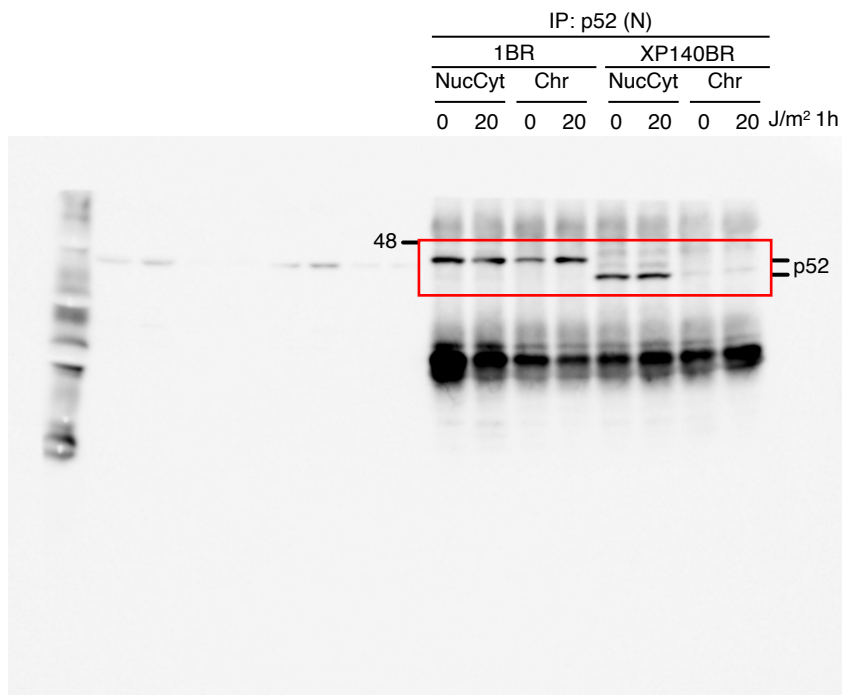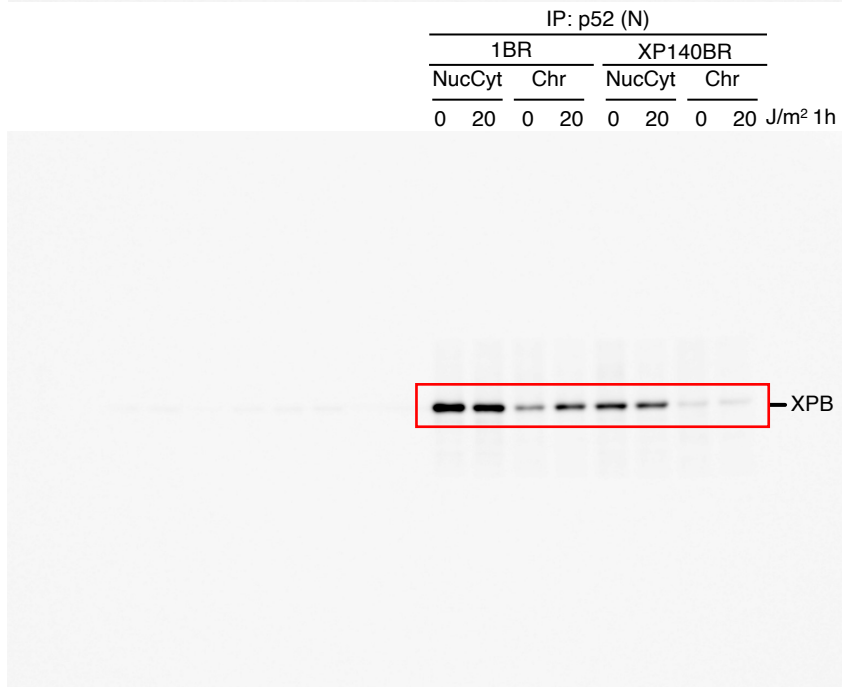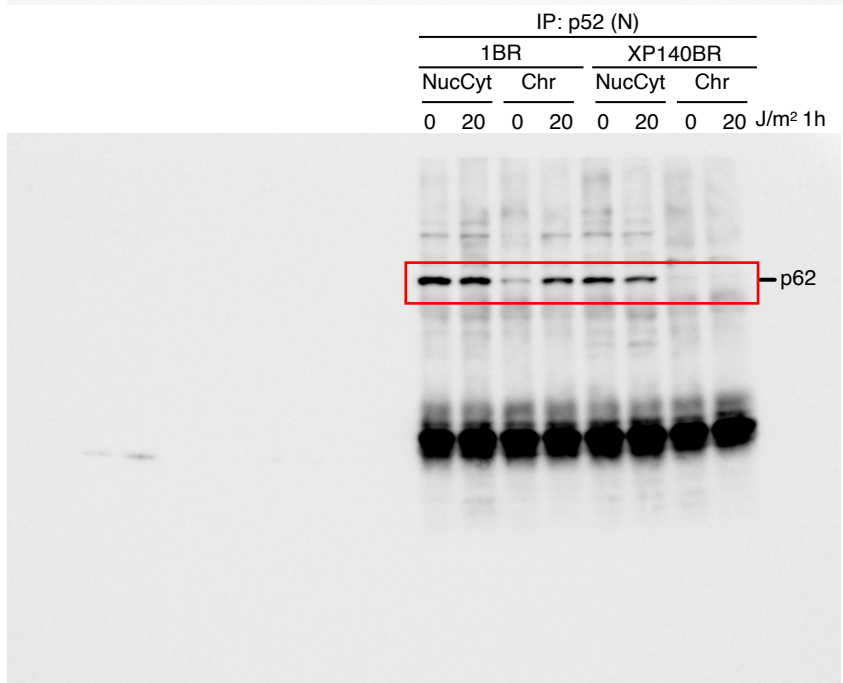

Fig2 e

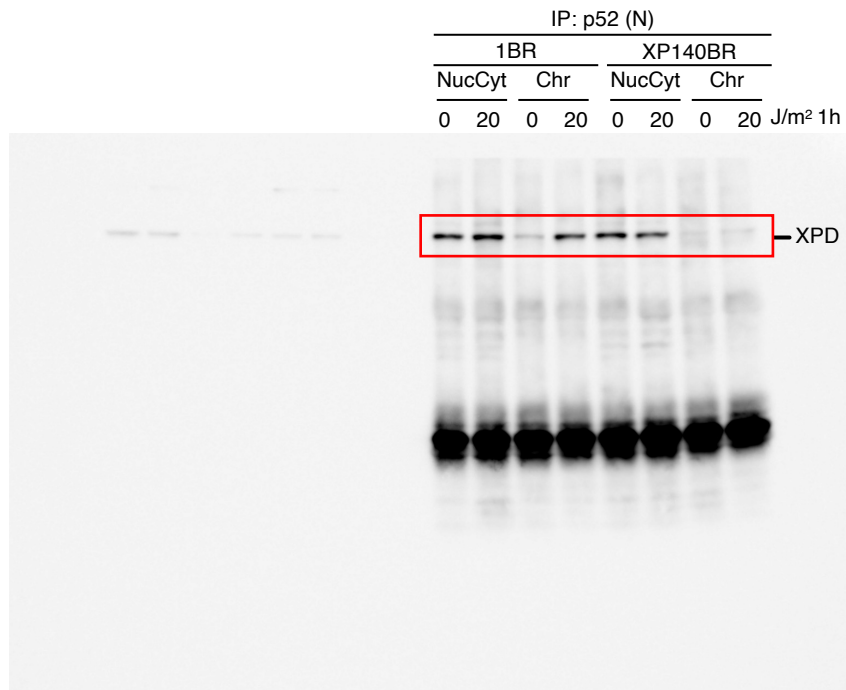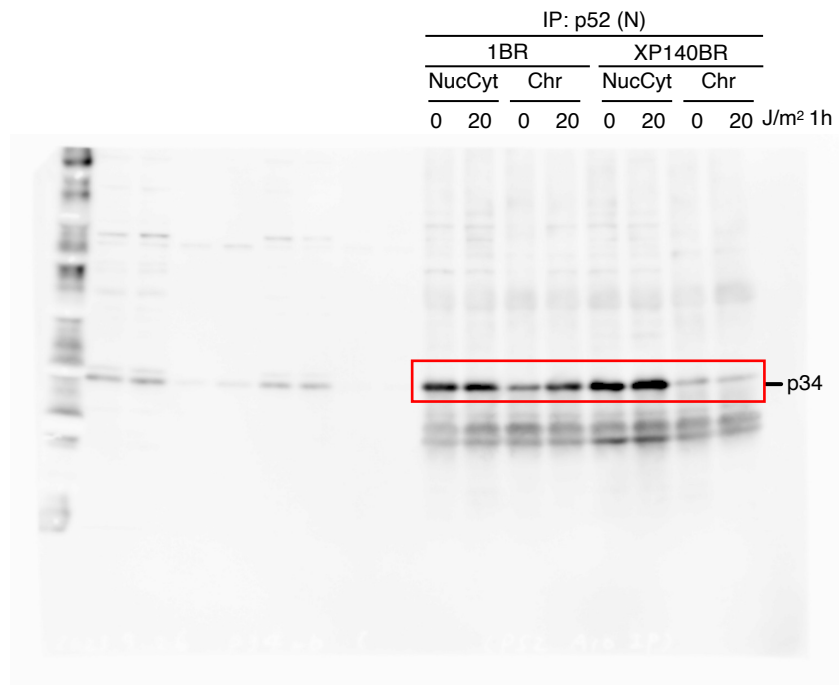

Fig3 a

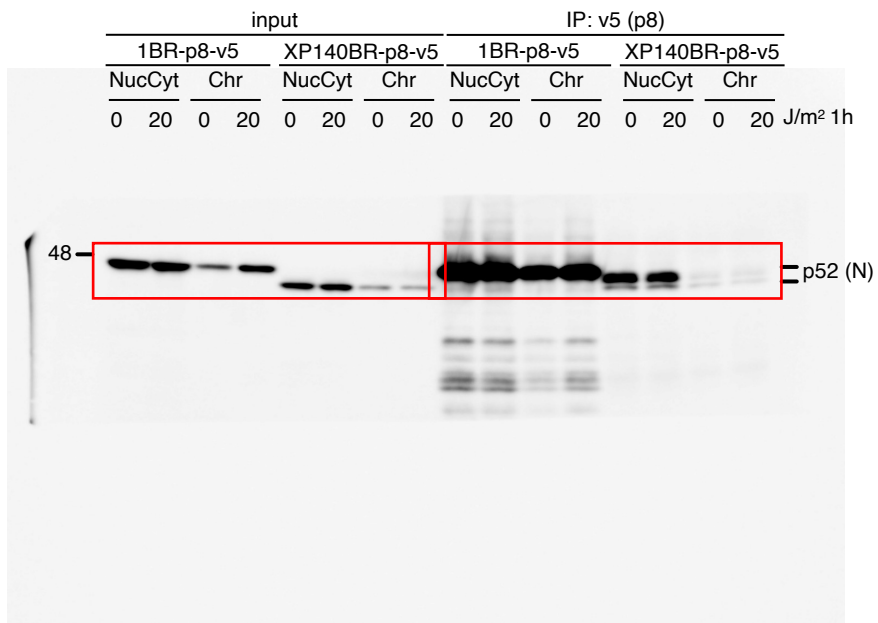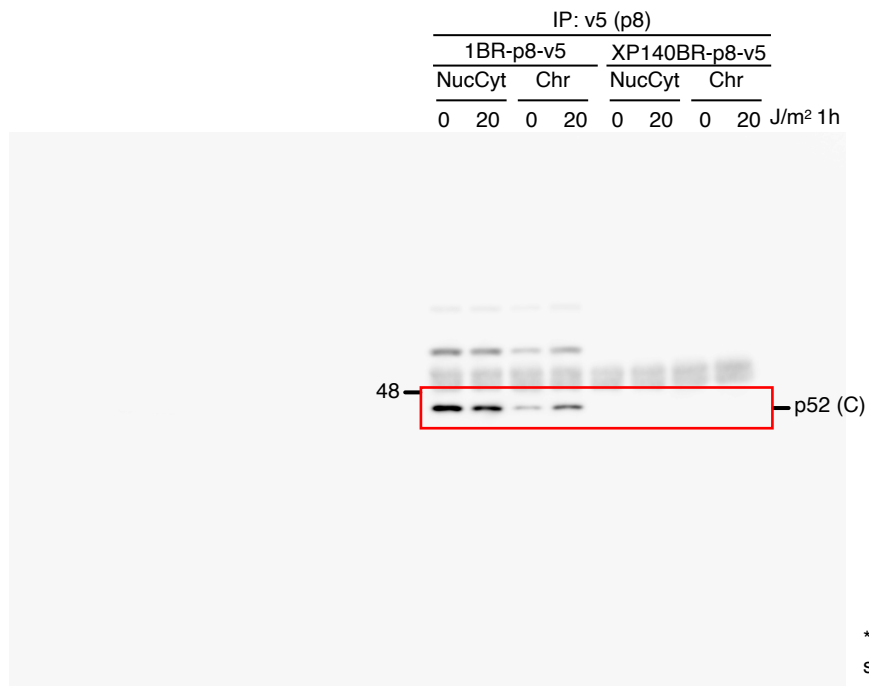

\* same membrane short exp.

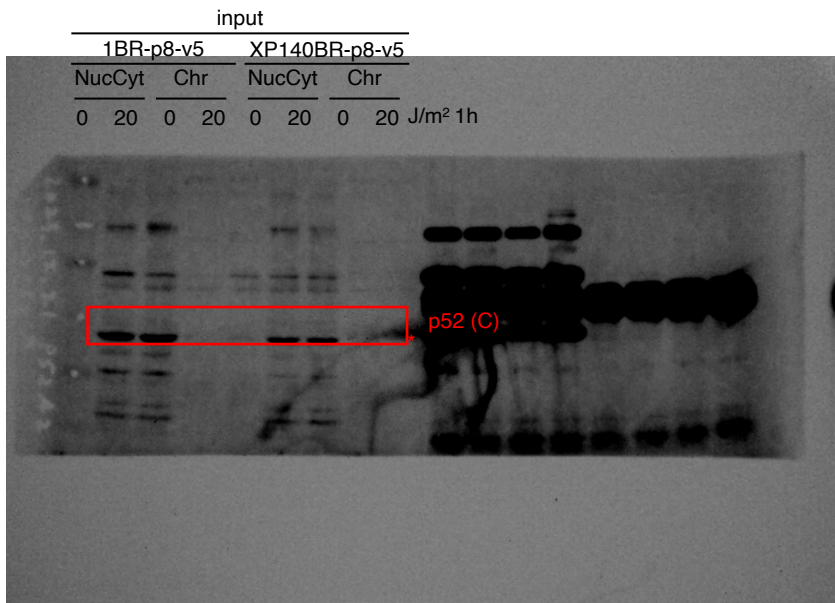

\* same membrane long exp.

Fig3 a

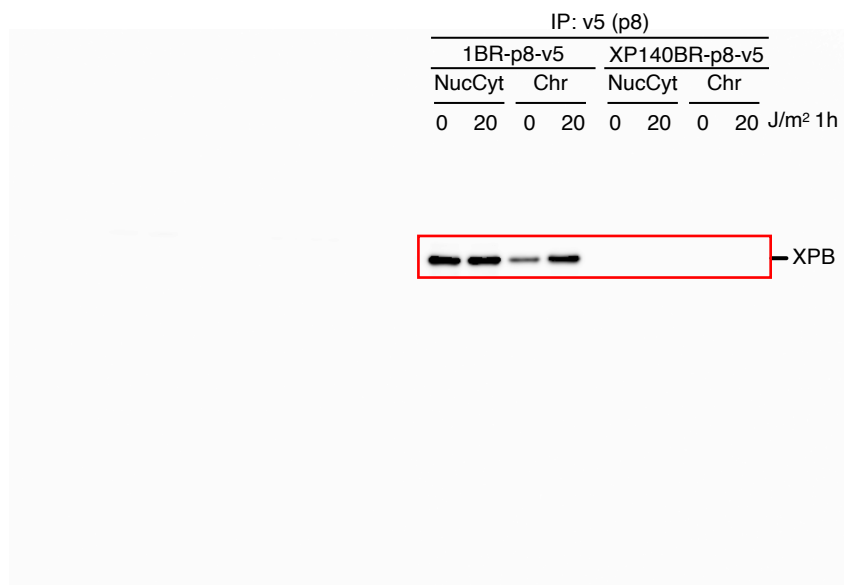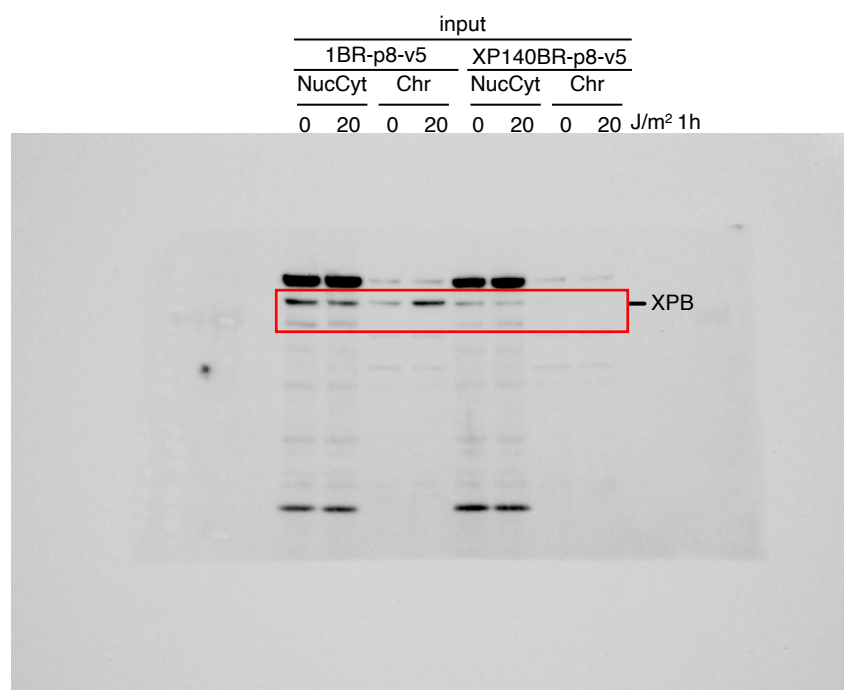

Fig3 a

| IP: v5 (p8)         |    |     |    |               |    |     |    |
|---------------------|----|-----|----|---------------|----|-----|----|
| 1BR-p8-v5           |    |     |    | XP140BR-p8-v5 |    |     |    |
| NucCyt              |    | Chr |    | NucCyt        |    | Chr |    |
| 0                   | 20 | 0   | 20 | 0             | 20 | 0   | 20 |
| J/m <sup>2</sup> 1h |    |     |    |               |    |     |    |

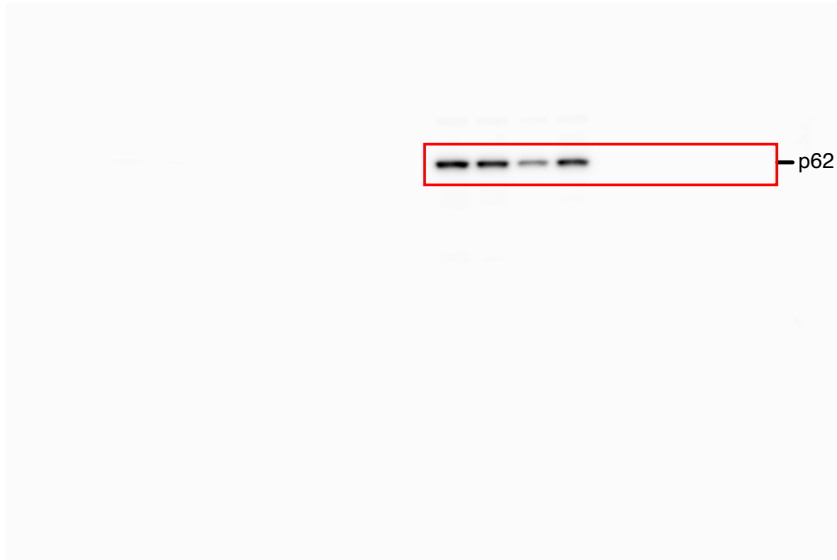

\*\* same membrane short exp.

| input               |    |     |    |               |    |     |    |
|---------------------|----|-----|----|---------------|----|-----|----|
| 1BR-p8-v5           |    |     |    | XP140BR-p8-v5 |    |     |    |
| NucCyt              |    | Chr |    | NucCyt        |    | Chr |    |
| 0                   | 20 | 0   | 20 | 0             | 20 | 0   | 20 |
| J/m <sup>2</sup> 1h |    |     |    |               |    |     |    |

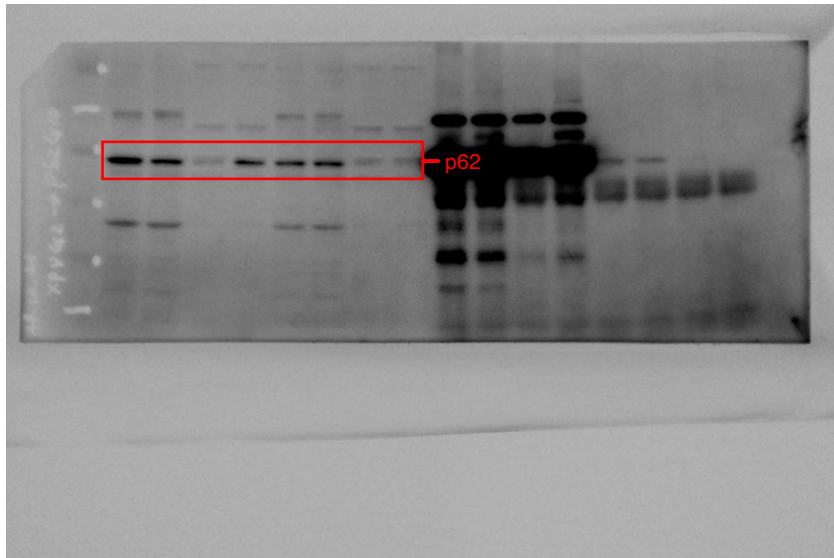

\*\* same membrane long exp.

Fig3 a

IP: v5 (p8)

| 1BR-p8-v5 |     | XP140BR-p8-v5 |     |   |    |   |    |
|-----------|-----|---------------|-----|---|----|---|----|
| NucCyt    | Chr | NucCyt        | Chr |   |    |   |    |
| 0         | 20  | 0             | 20  | 0 | 20 | 0 | 20 |

J/m<sup>2</sup> 1h

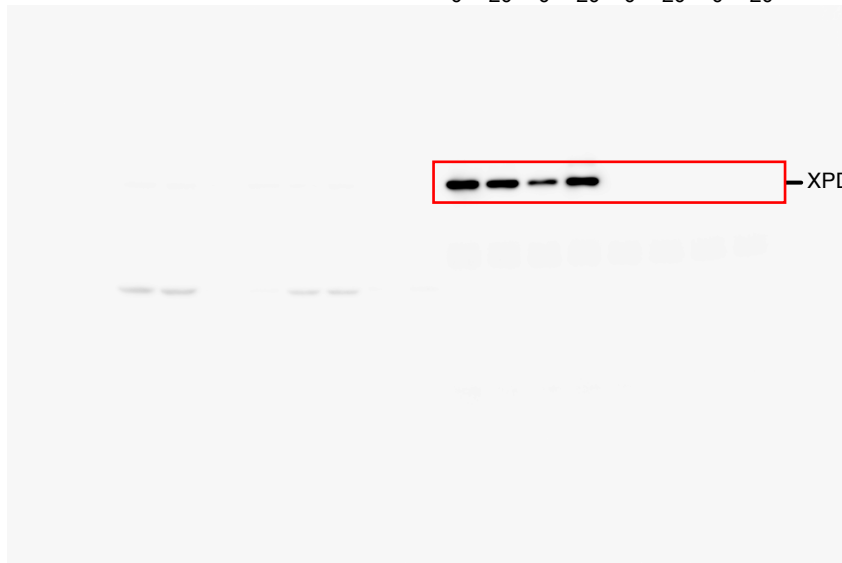

\*\*\* same membrane short exp.

input

| 1BR-p8-v5 |     | XP140BR-p8-v5 |     |   |    |   |    |
|-----------|-----|---------------|-----|---|----|---|----|
| NucCyt    | Chr | NucCyt        | Chr |   |    |   |    |
| 0         | 20  | 0             | 20  | 0 | 20 | 0 | 20 |

J/m<sup>2</sup> 1h

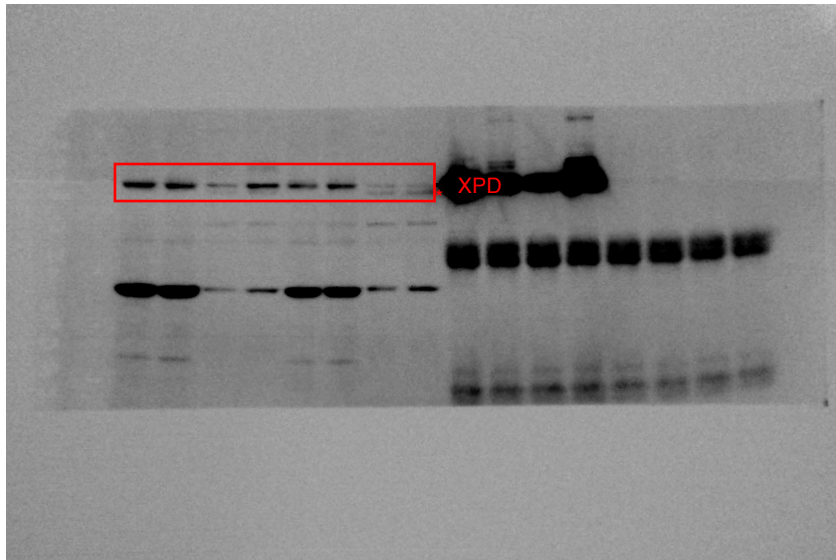

\*\*\* same membrane long exp.

Fig3 a

| input     |    |     |    |               |    |     |    | IP: v5 (p8) |    |     |    |               |    |     |    |
|-----------|----|-----|----|---------------|----|-----|----|-------------|----|-----|----|---------------|----|-----|----|
| 1BR-p8-v5 |    |     |    | XP140BR-p8-v5 |    |     |    | 1BR-p8-v5   |    |     |    | XP140BR-p8-v5 |    |     |    |
| NucCyt    |    | Chr |    | NucCyt        |    | Chr |    | NucCyt      |    | Chr |    | NucCyt        |    | Chr |    |
| 0         | 20 | 0   | 20 | 0             | 20 | 0   | 20 | 0           | 20 | 0   | 20 | 0             | 20 | 0   | 20 |

J/m<sup>2</sup> 1h

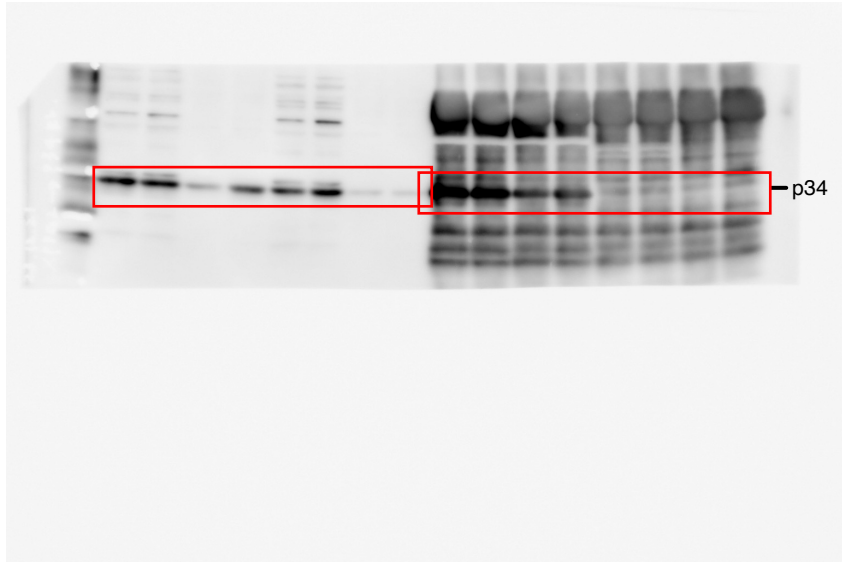

| IP: v5 (p8) |    |     |    |               |    |     |    |
|-------------|----|-----|----|---------------|----|-----|----|
| 1BR-p8-v5   |    |     |    | XP140BR-p8-v5 |    |     |    |
| NucCyt      |    | Chr |    | NucCyt        |    | Chr |    |
| 0           | 20 | 0   | 20 | 0             | 20 | 0   | 20 |

J/m<sup>2</sup> 1h

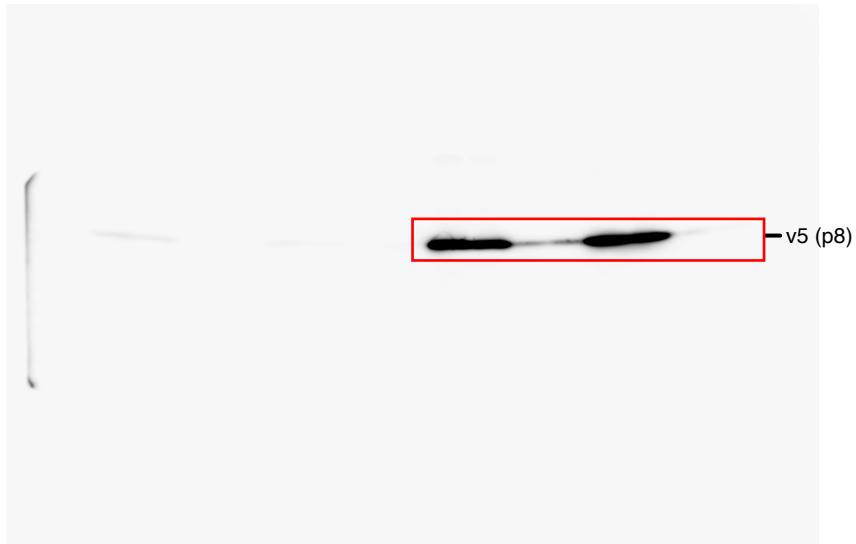

| input     |    |     |    |               |    |     |    |
|-----------|----|-----|----|---------------|----|-----|----|
| 1BR-p8-v5 |    |     |    | XP140BR-p8-v5 |    |     |    |
| NucCyt    |    | Chr |    | NucCyt        |    | Chr |    |
| 0         | 20 | 0   | 20 | 0             | 20 | 0   | 20 |

J/m<sup>2</sup> 1h

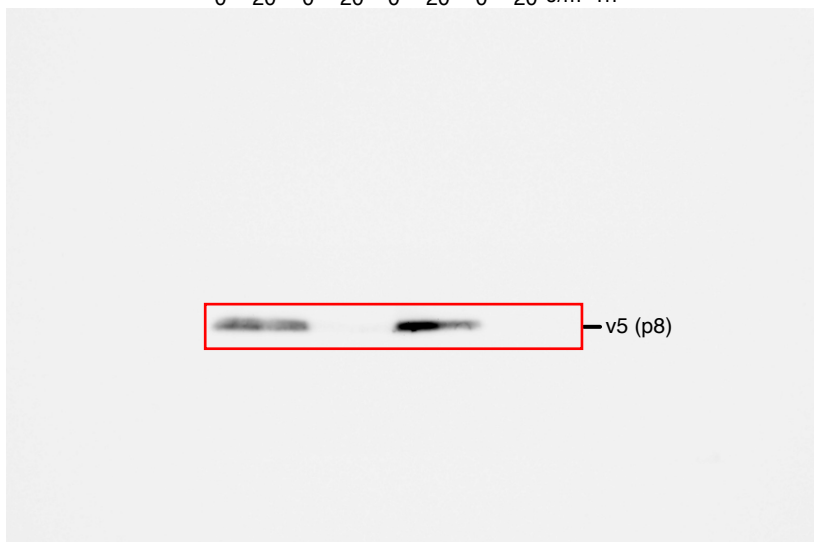

Fig3 a

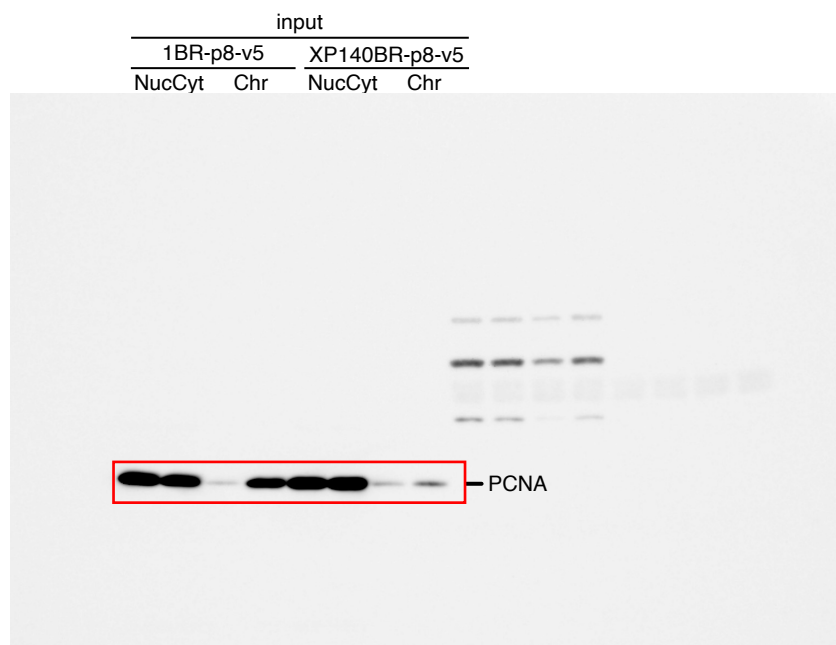



Fig3 d

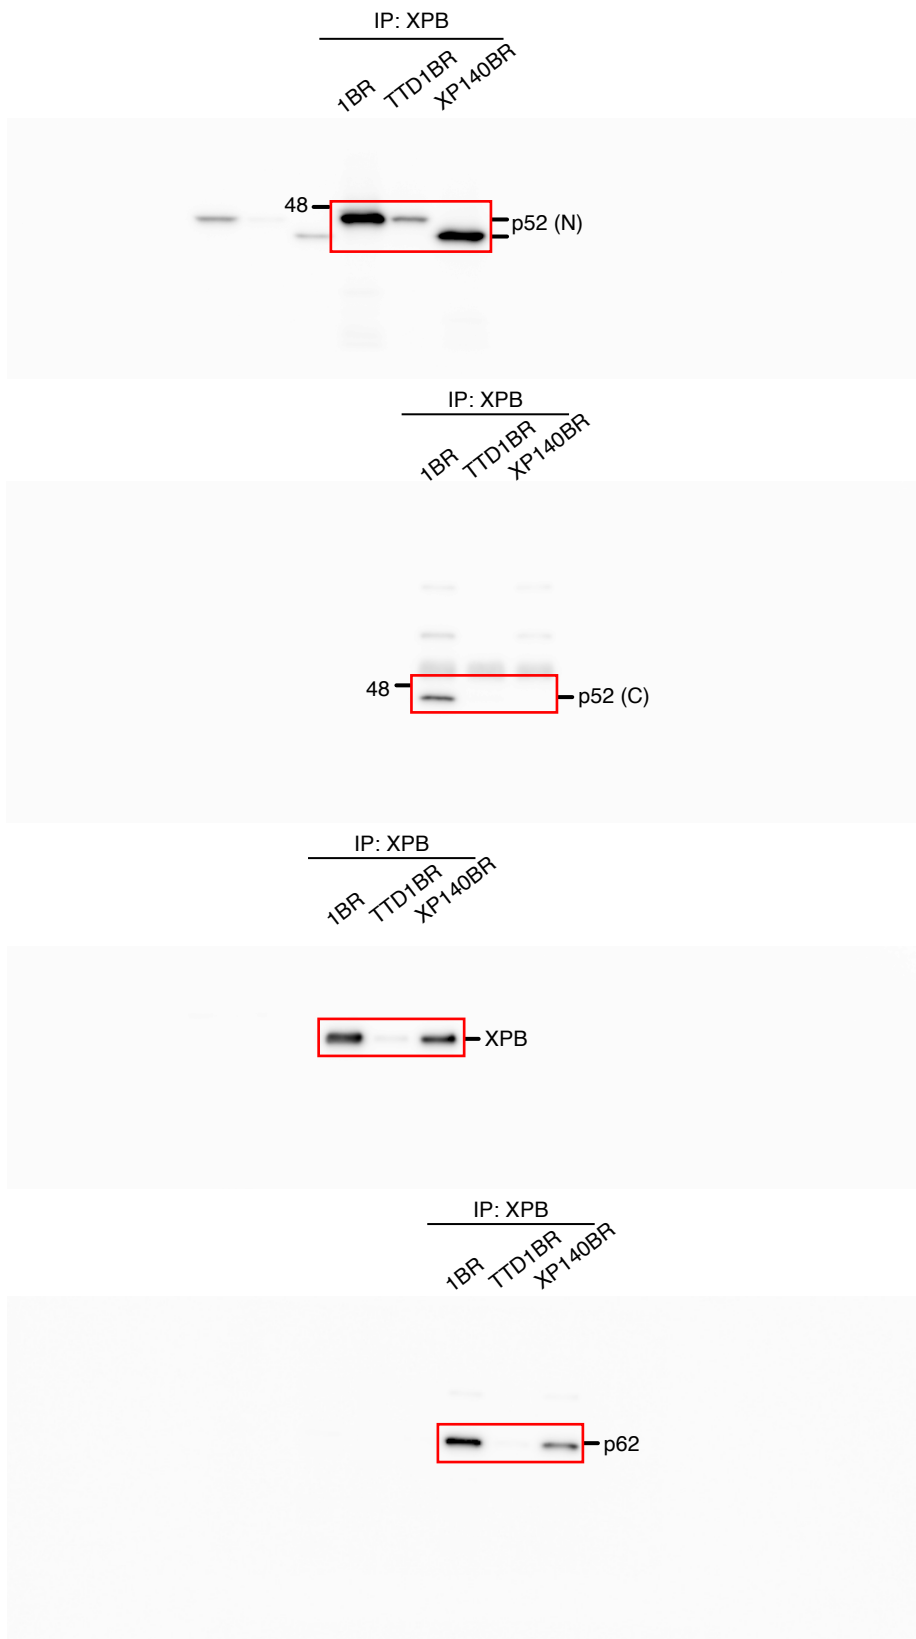

Fig3 d

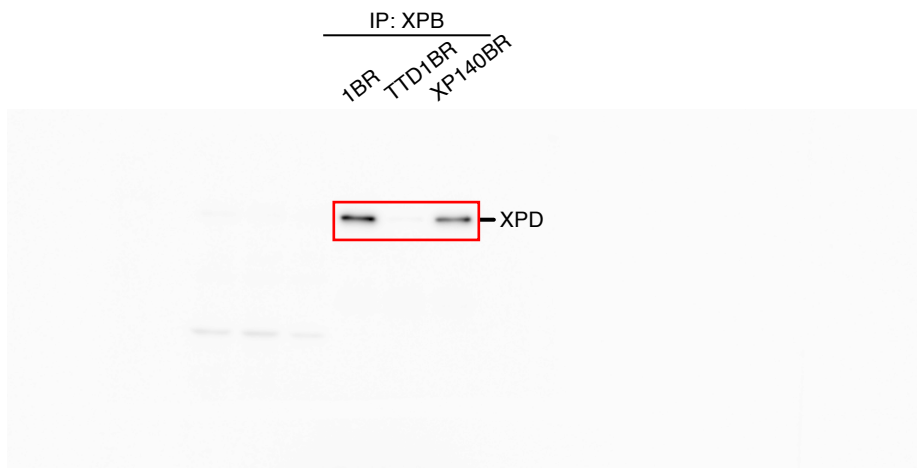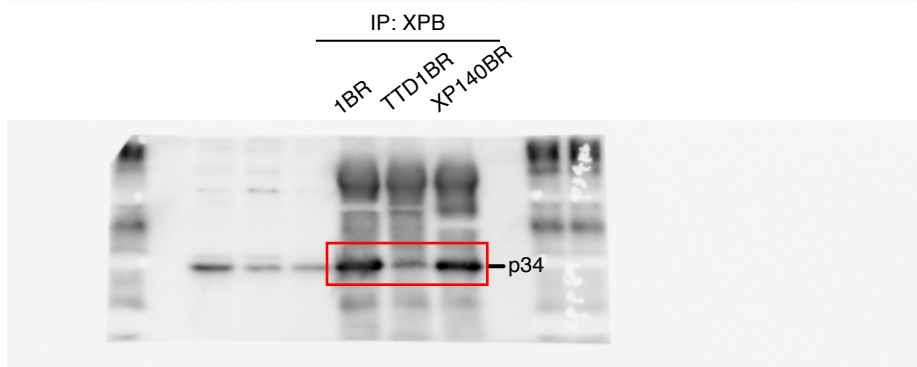

Fig3 d

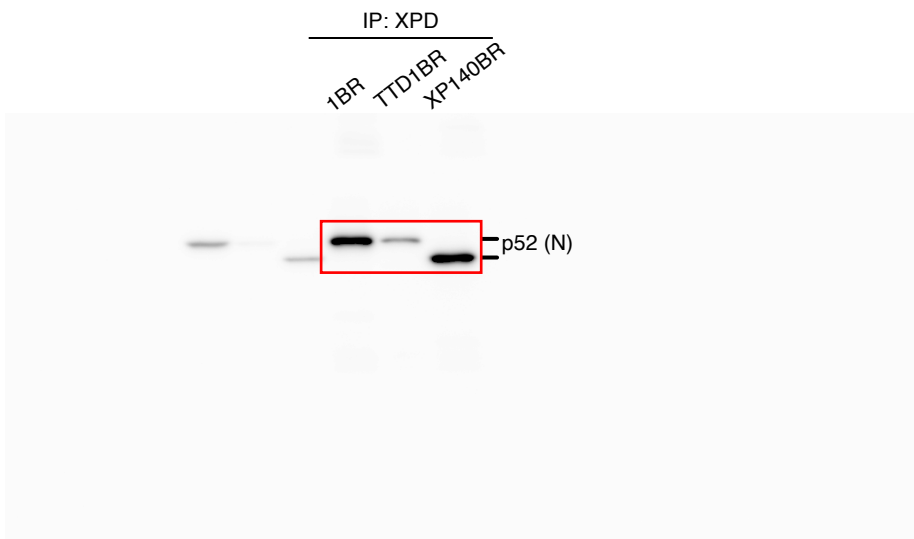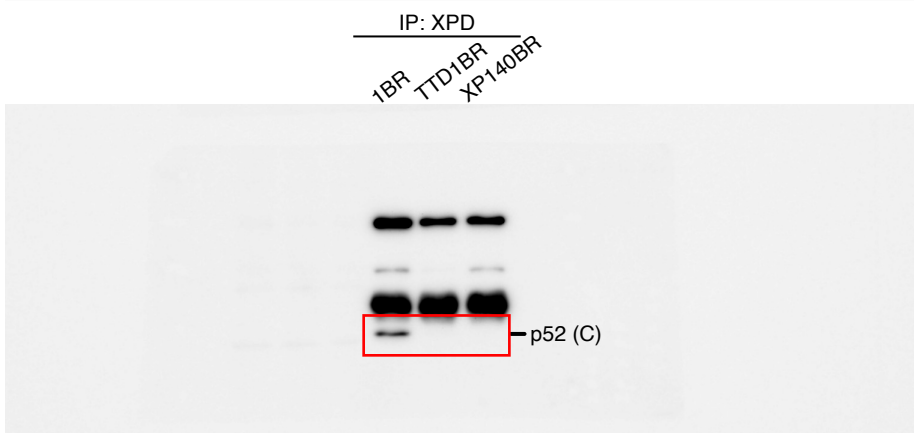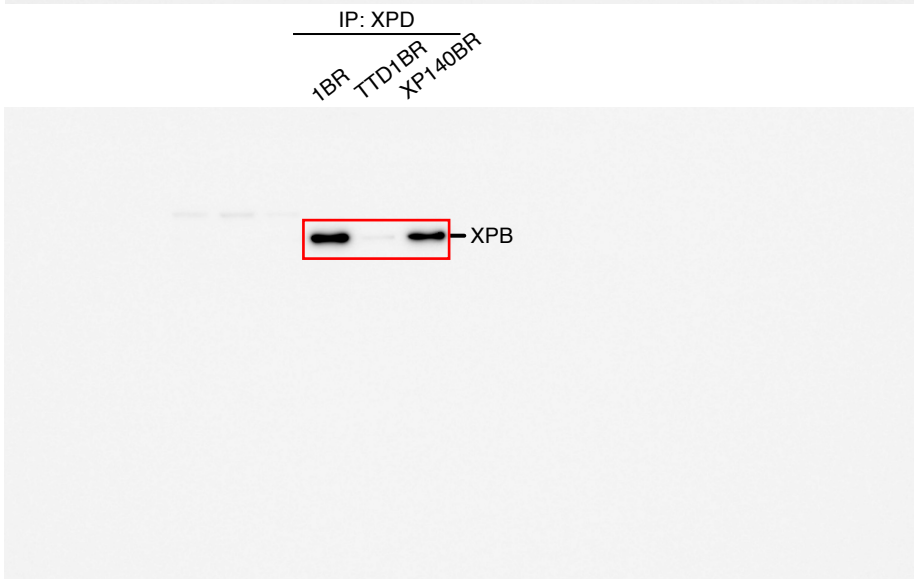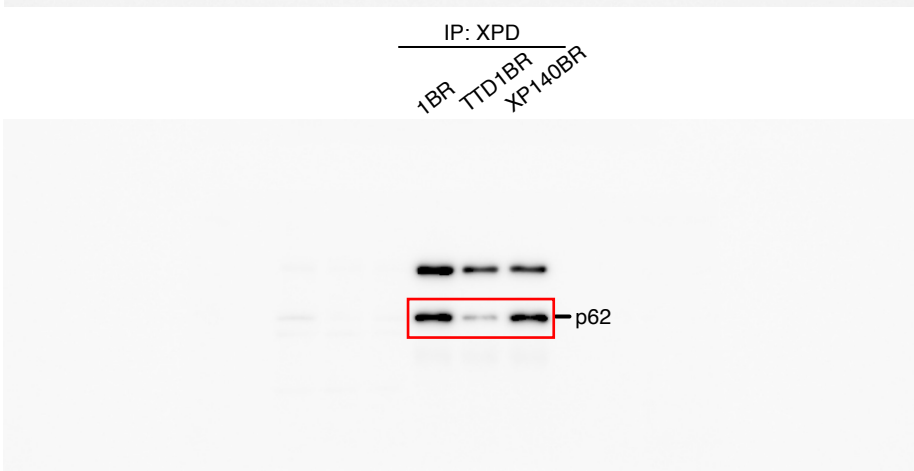

Fig3 d

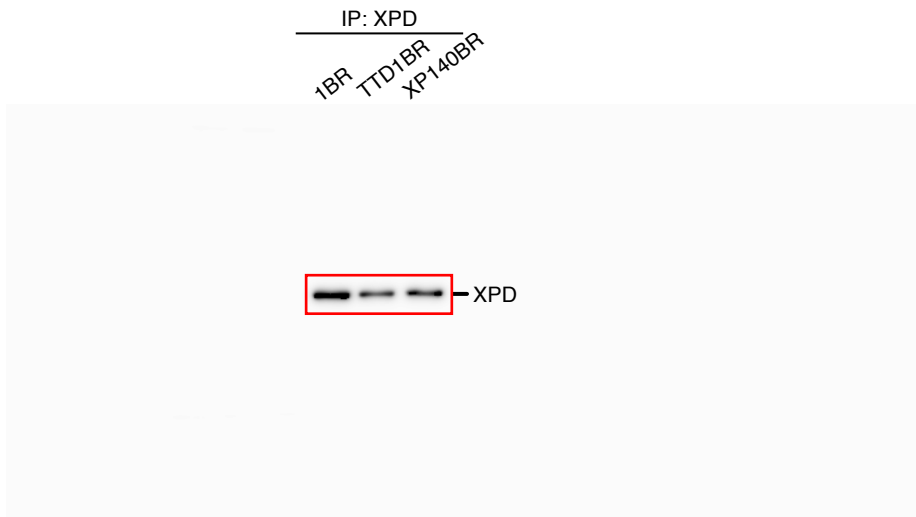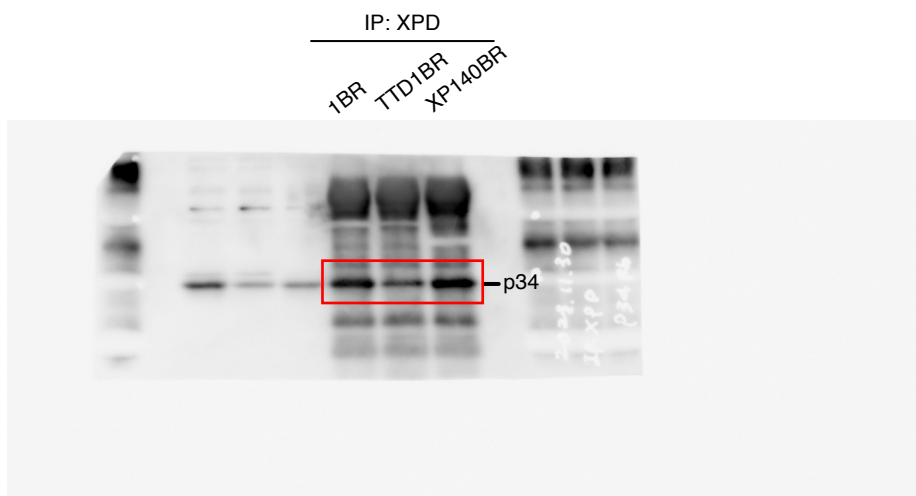

Fig3 d

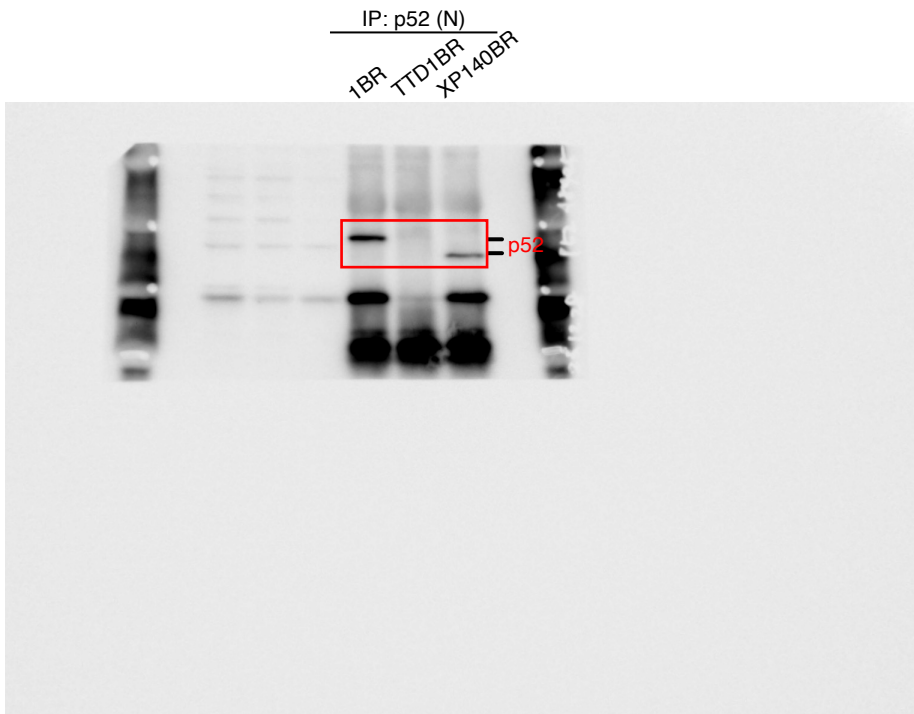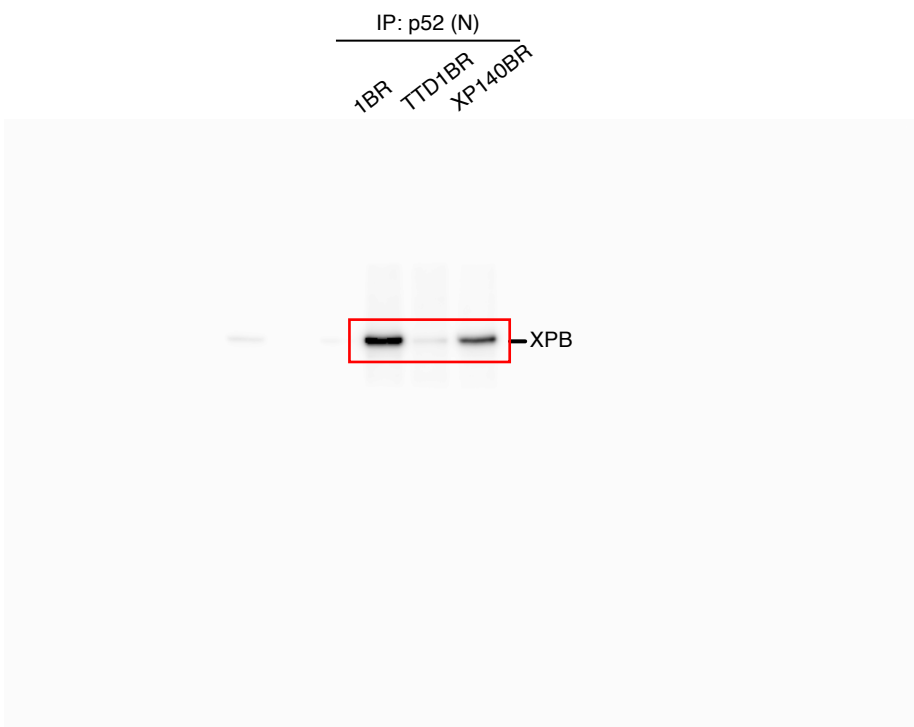

Fig3 d

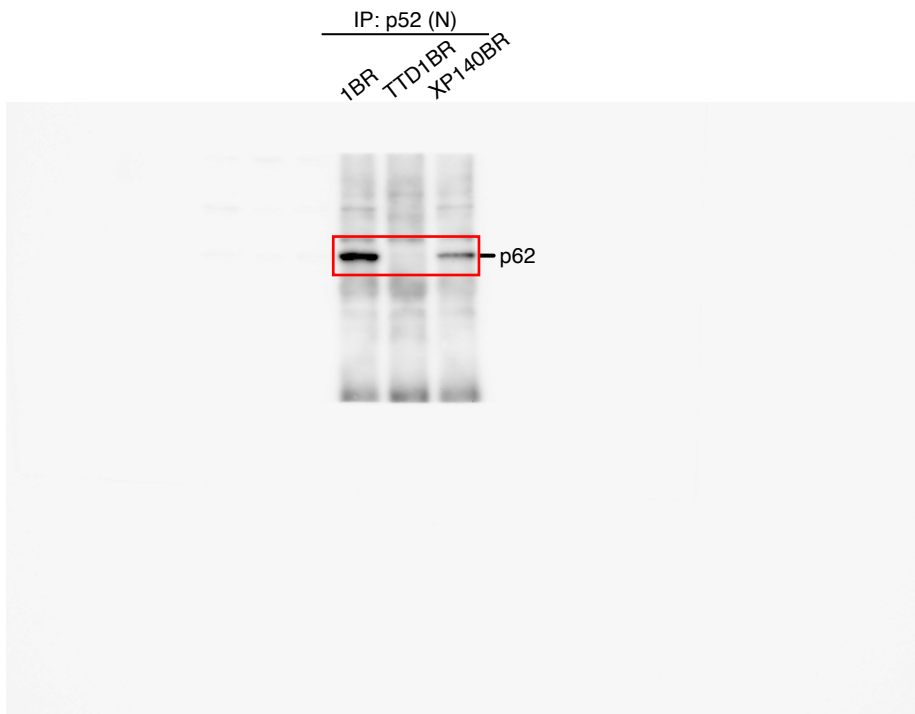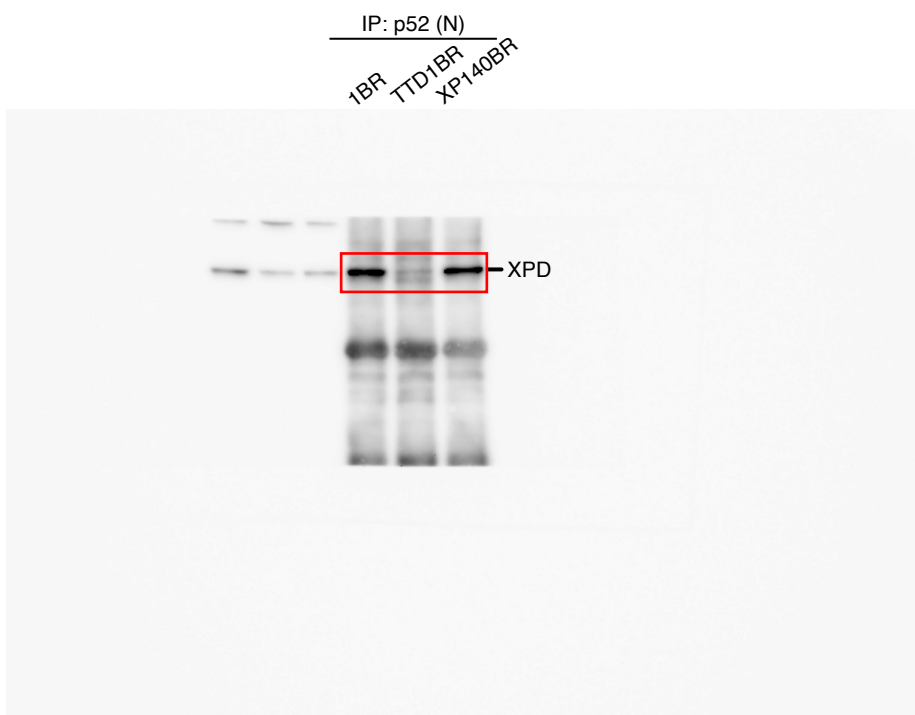

Fig3 d

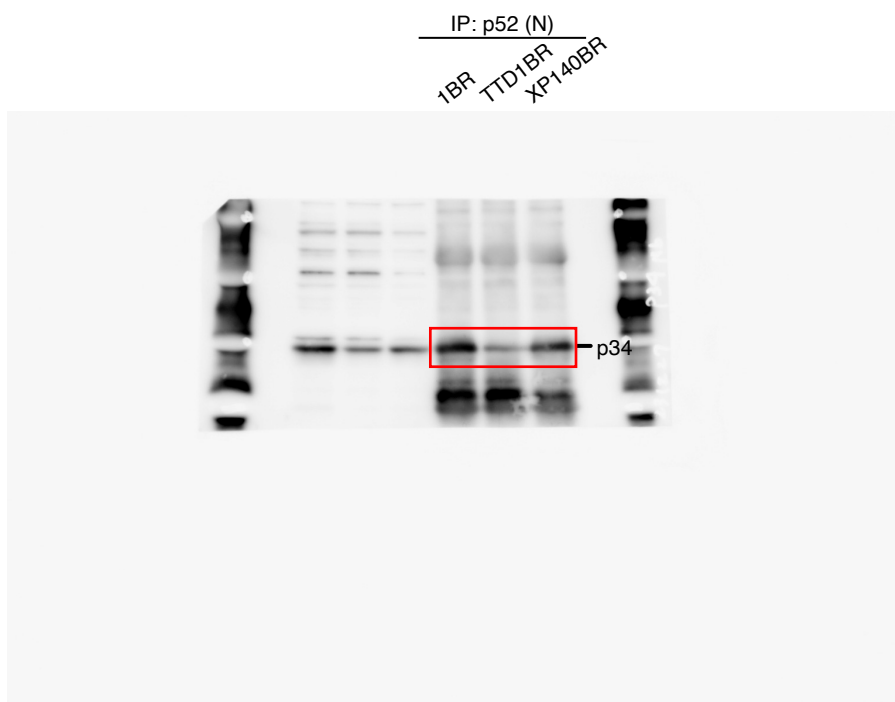

Fig3 e

| IP: RNAPII (Ser2) |    |     |    |        |    |     |    |         |    |     |    |
|-------------------|----|-----|----|--------|----|-----|----|---------|----|-----|----|
| 1BR               |    |     |    | TTD1BR |    |     |    | XP140BR |    |     |    |
| NucCyt            |    | chr |    | NucCyt |    | chr |    | NucCyt  |    | chr |    |
| 0                 | 20 | 0   | 20 | 0      | 20 | 0   | 20 | 0       | 20 | 0   | 20 |

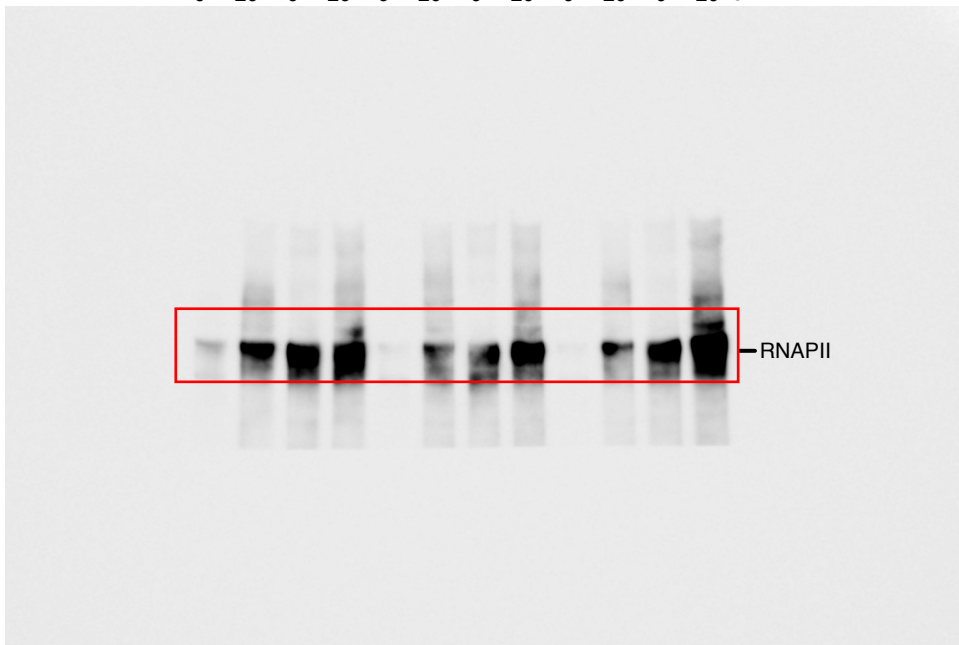

| input  |    |     |    |        |    |     |    |         |    |     |    |
|--------|----|-----|----|--------|----|-----|----|---------|----|-----|----|
| 1BR    |    |     |    | TTD1BR |    |     |    | XP140BR |    |     |    |
| NucCyt |    | chr |    | NucCyt |    | chr |    | NucCyt  |    | chr |    |
| 0      | 20 | 0   | 20 | 0      | 20 | 0   | 20 | 0       | 20 | 0   | 20 |

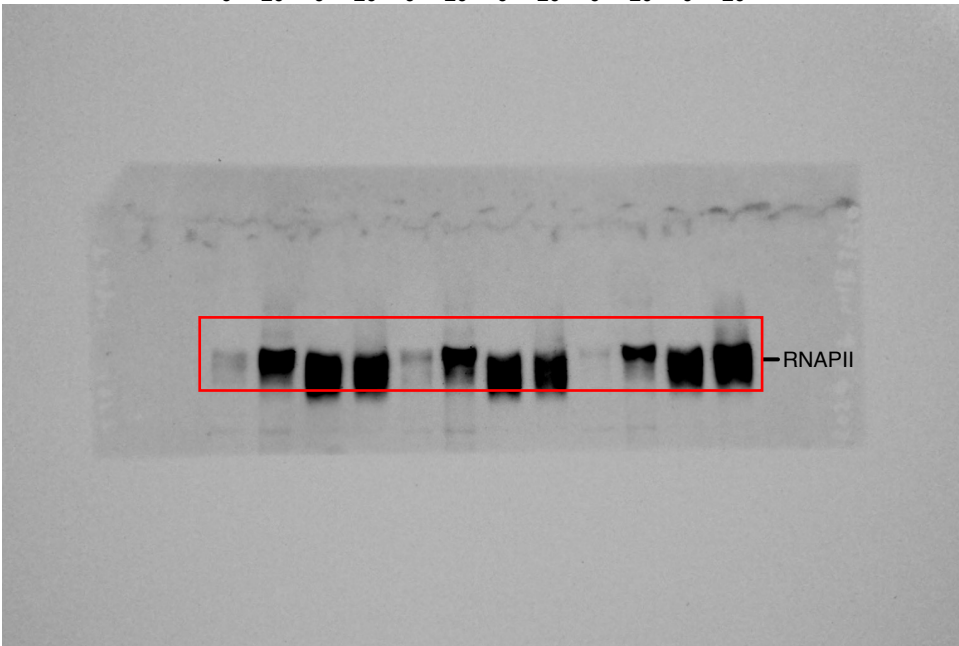

Fig3 e

IP: RNAPII (Ser2)

| 1BR                 |    | TTD1BR |    |        |    | XP140BR |    |        |    |     |    |
|---------------------|----|--------|----|--------|----|---------|----|--------|----|-----|----|
| NucCyt              |    | chr    |    | NucCyt |    | chr     |    | NucCyt |    | chr |    |
| 0                   | 20 | 0      | 20 | 0      | 20 | 0       | 20 | 0      | 20 | 0   | 20 |
| J/m <sup>2</sup> 1h |    |        |    |        |    |         |    |        |    |     |    |

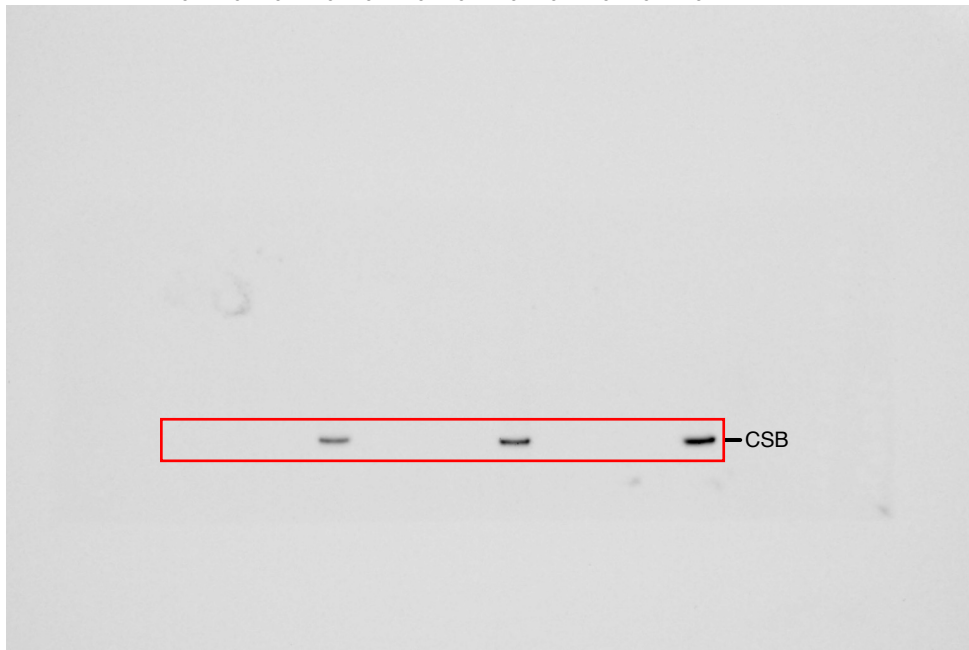

input

| 1BR                 |    | TTD1BR |    |        |    | XP140BR |    |        |    |     |    |
|---------------------|----|--------|----|--------|----|---------|----|--------|----|-----|----|
| NucCyt              |    | chr    |    | NucCyt |    | chr     |    | NucCyt |    | chr |    |
| 0                   | 20 | 0      | 20 | 0      | 20 | 0       | 20 | 0      | 20 | 0   | 20 |
| J/m <sup>2</sup> 1h |    |        |    |        |    |         |    |        |    |     |    |

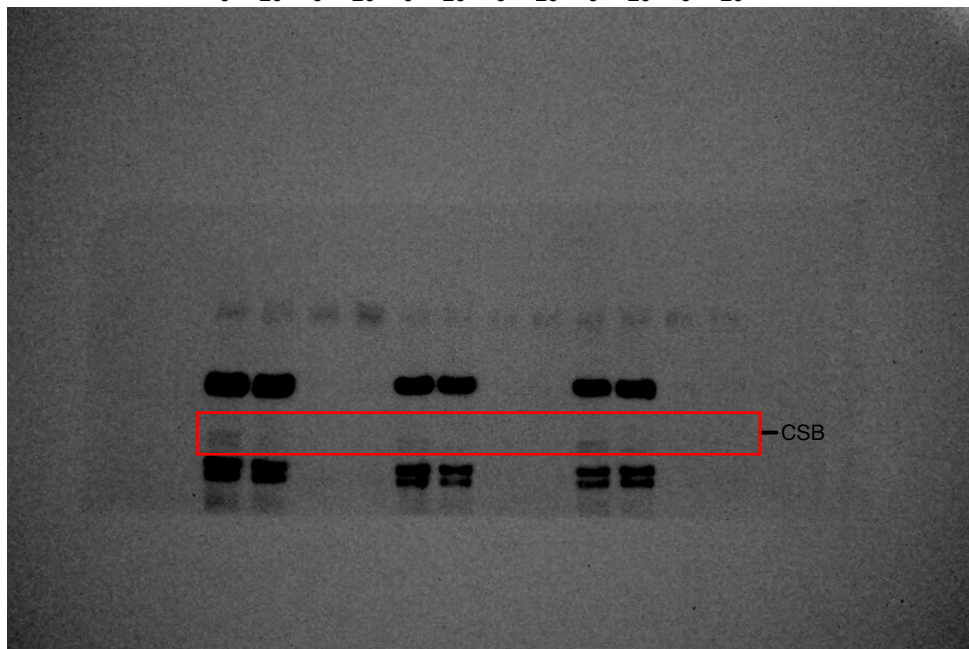

Fig3 e

IP: RNAPII (Ser2)

| 1BR    |     | TTD1BR |     | XP140BR |     | J/m <sup>2</sup> 1h |   |    |   |
|--------|-----|--------|-----|---------|-----|---------------------|---|----|---|
| NucCyt | chr | NucCyt | chr | NucCyt  | chr |                     |   |    |   |
| 0      | 20  | 0      | 20  | 0       | 20  |                     | 0 | 20 | 0 |

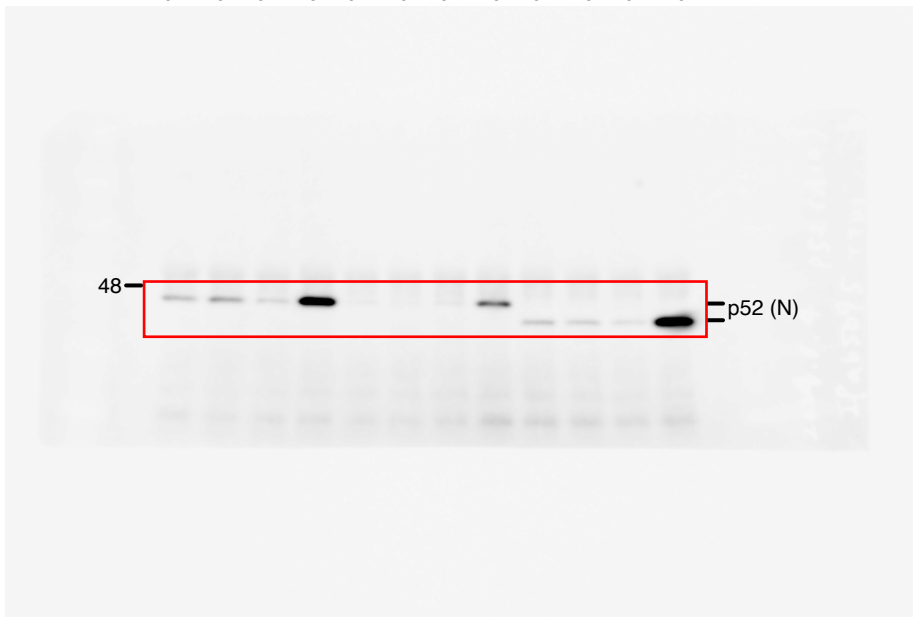

| 1BR    |     | TTD1BR |     | XP140BR |     | J/m <sup>2</sup> 1h |   |    |   |
|--------|-----|--------|-----|---------|-----|---------------------|---|----|---|
| NucCyt | chr | NucCyt | chr | NucCyt  | chr |                     |   |    |   |
| 0      | 20  | 0      | 20  | 0       | 20  |                     | 0 | 20 | 0 |

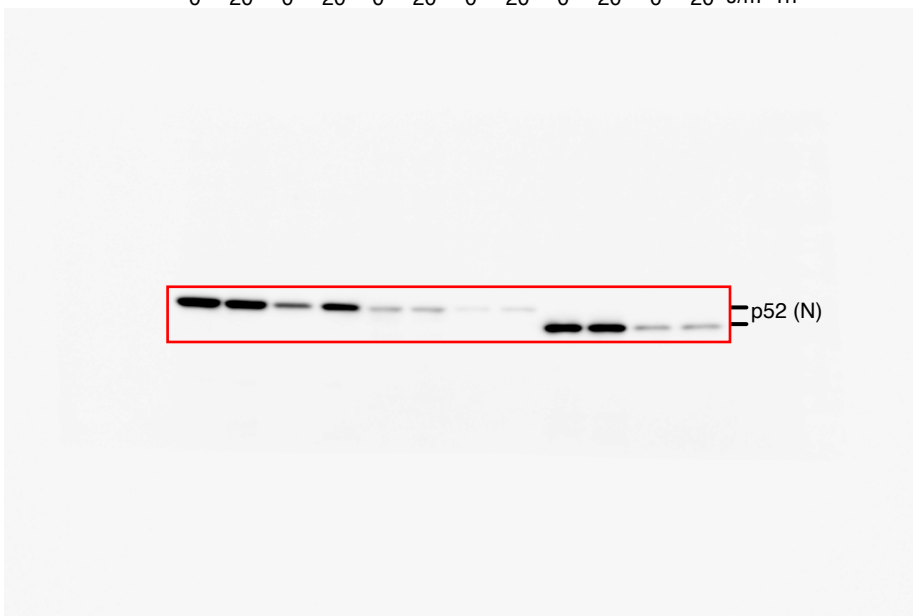

Fig3 e

IP: RNAPII (Ser2)

| 1BR    |     | TTD1BR |     |        |     | XP140BR |     |        |     |
|--------|-----|--------|-----|--------|-----|---------|-----|--------|-----|
| NucCyt | chr | NucCyt | chr | NucCyt | chr | NucCyt  | chr | NucCyt | chr |
| 0      | 20  | 0      | 20  | 0      | 20  | 0       | 20  | 0      | 20  |

J/m<sup>2</sup> 1h

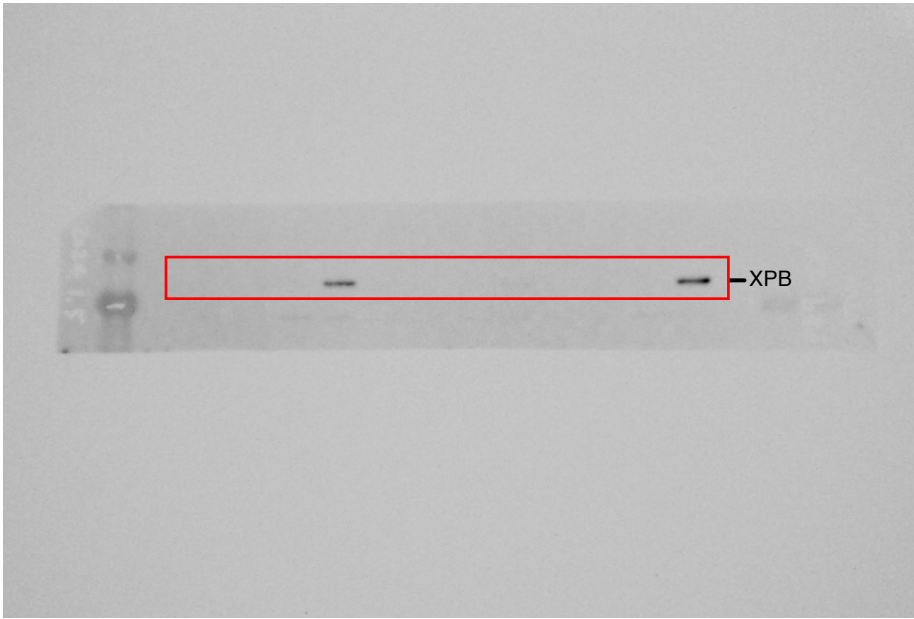

input

| 1BR    |     | TTD1BR |     |        |     | XP140BR |     |        |     |
|--------|-----|--------|-----|--------|-----|---------|-----|--------|-----|
| NucCyt | chr | NucCyt | chr | NucCyt | chr | NucCyt  | chr | NucCyt | chr |
| 0      | 20  | 0      | 20  | 0      | 20  | 0       | 20  | 0      | 20  |

J/m<sup>2</sup> 1h

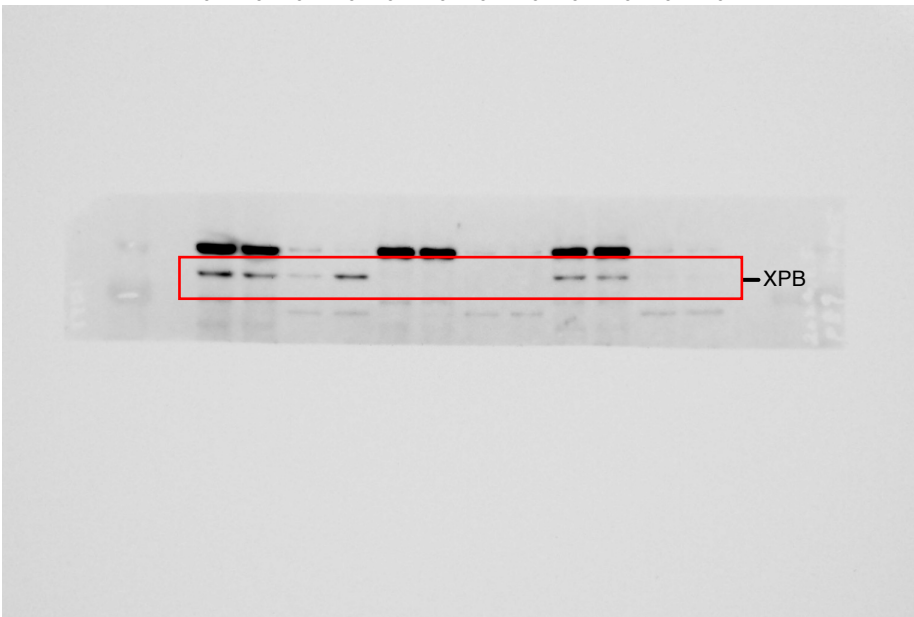

Fig3 e

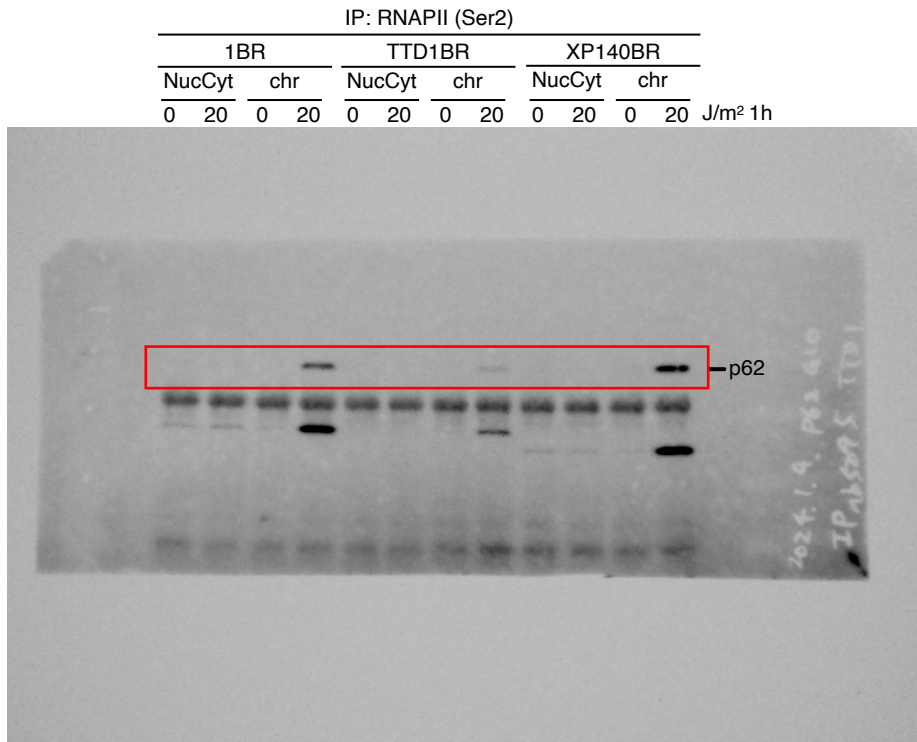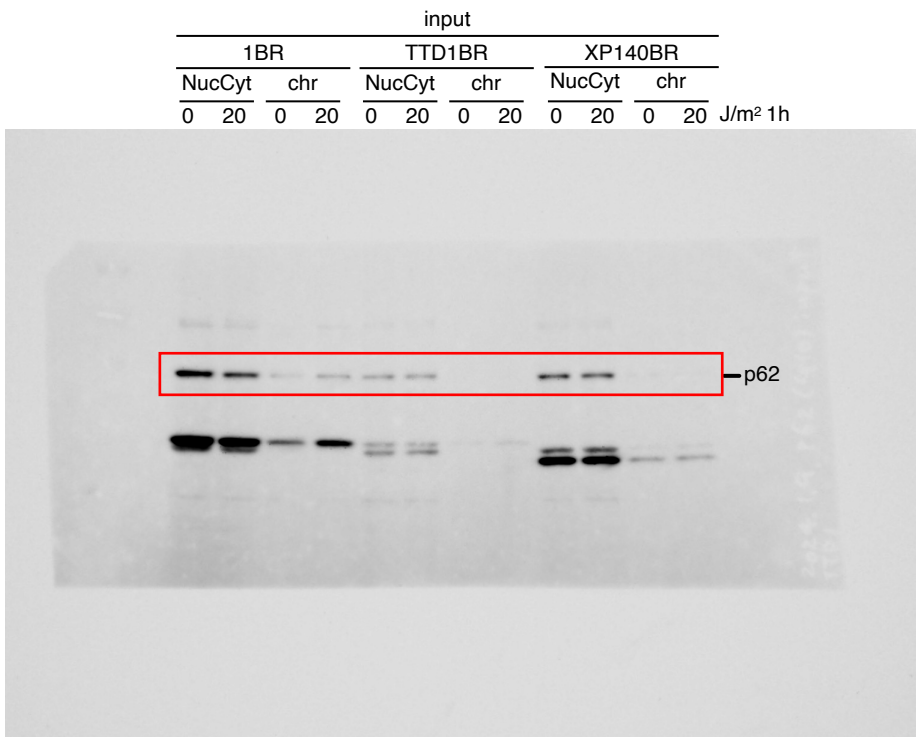

Fig3 e

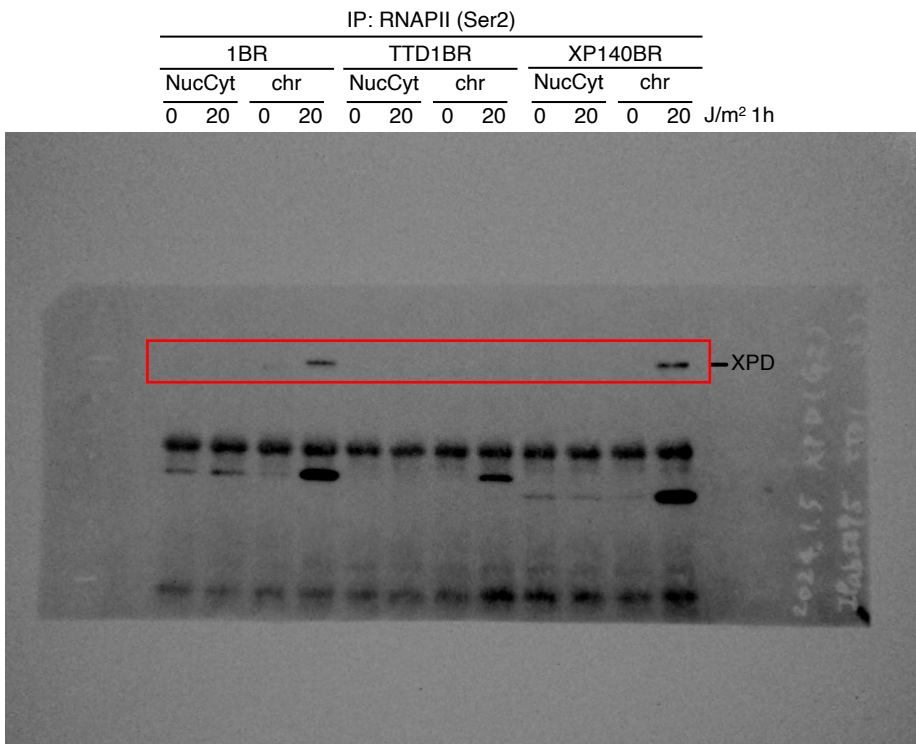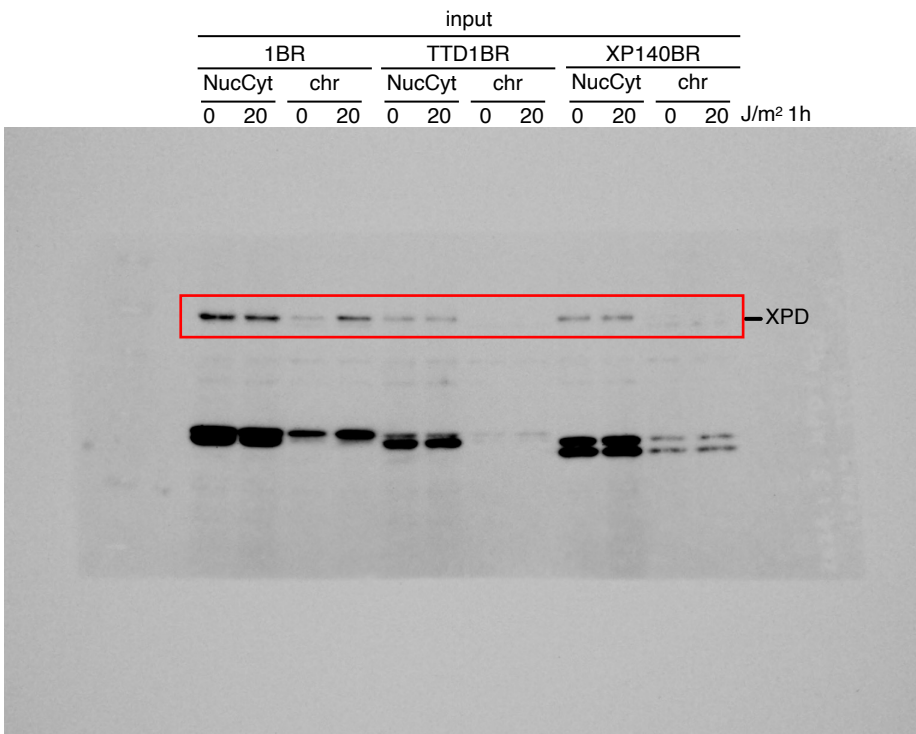

Fig3 e

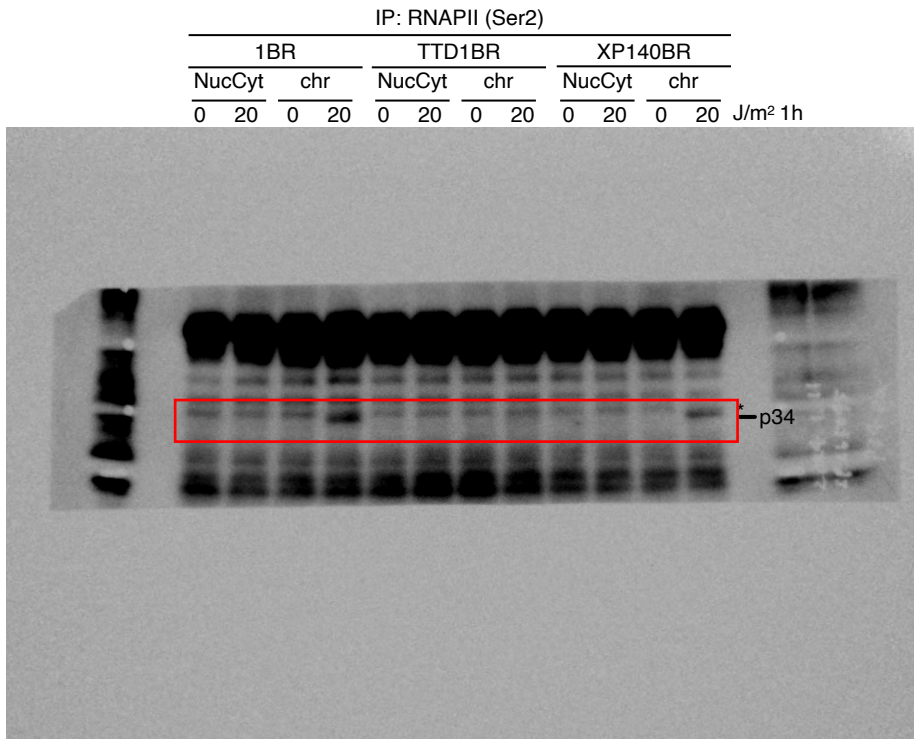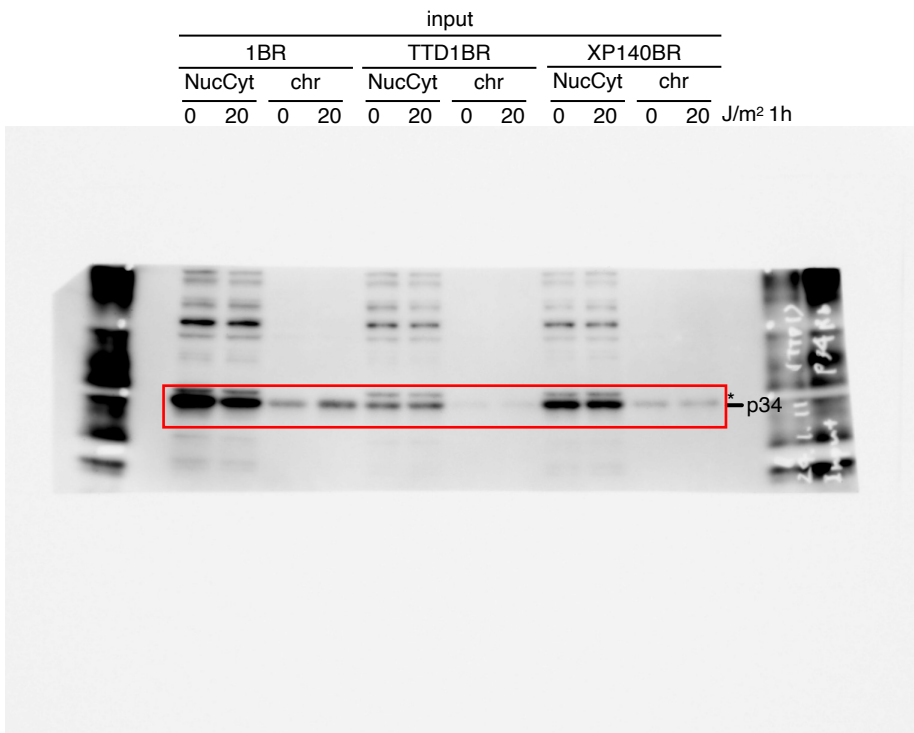

Fig3 e

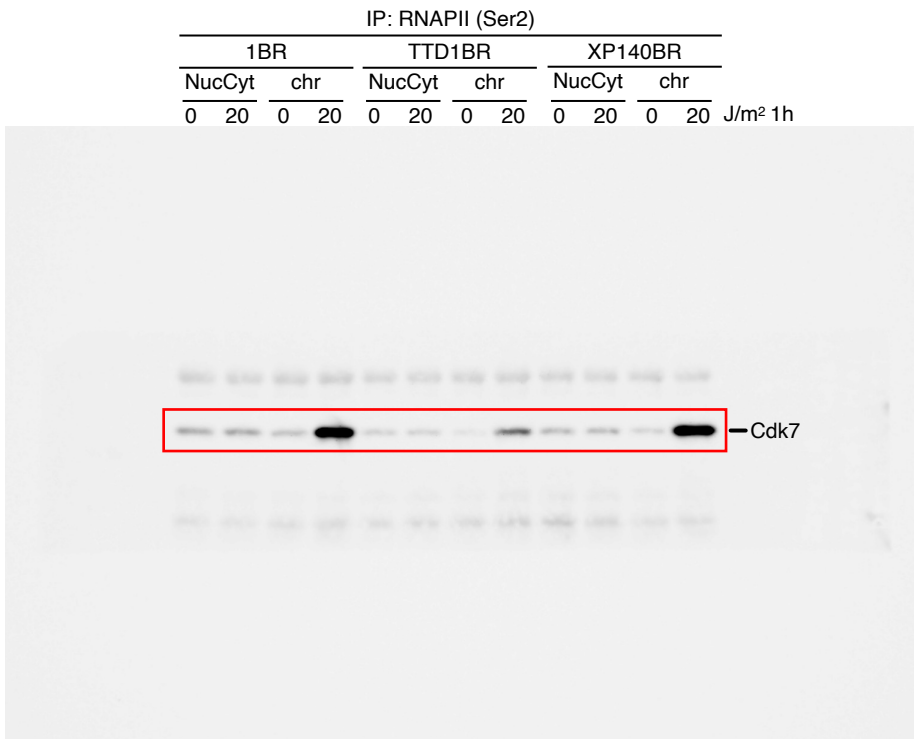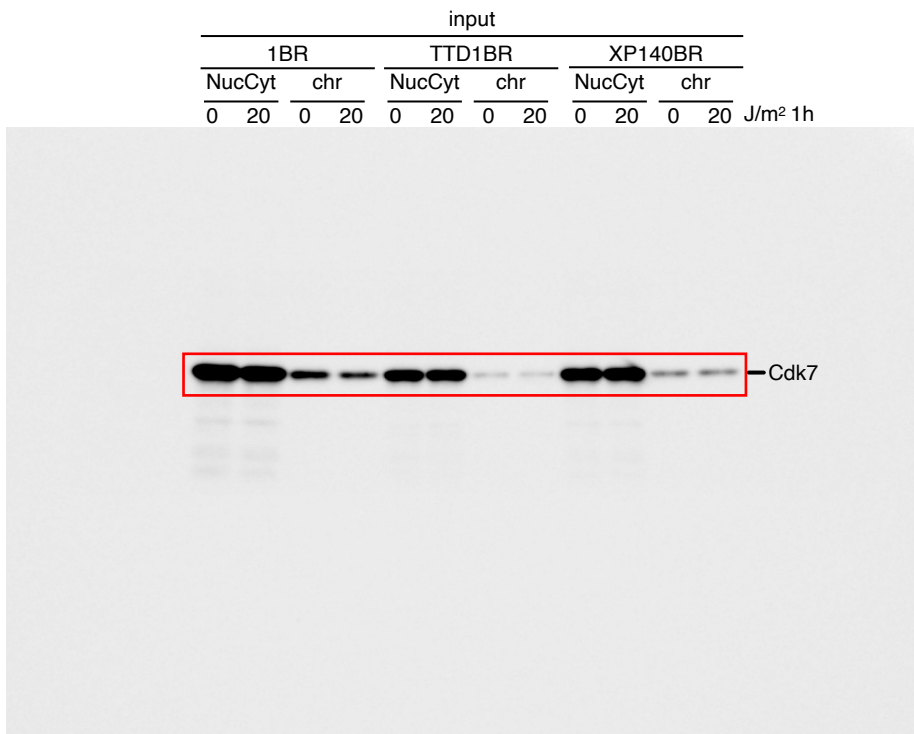

Fig3 e

| IP: RNAPII (Ser2) |     |        |     |        |     |         |     |        |     |                     |  |
|-------------------|-----|--------|-----|--------|-----|---------|-----|--------|-----|---------------------|--|
| 1BR               |     | TTD1BR |     |        |     | XP140BR |     |        |     |                     |  |
| NucCyt            | chr | NucCyt | chr | NucCyt | chr | NucCyt  | chr | NucCyt | chr |                     |  |
| 0                 | 20  | 0      | 20  | 0      | 20  | 0       | 20  | 0      | 20  | J/m <sup>2</sup> 1h |  |

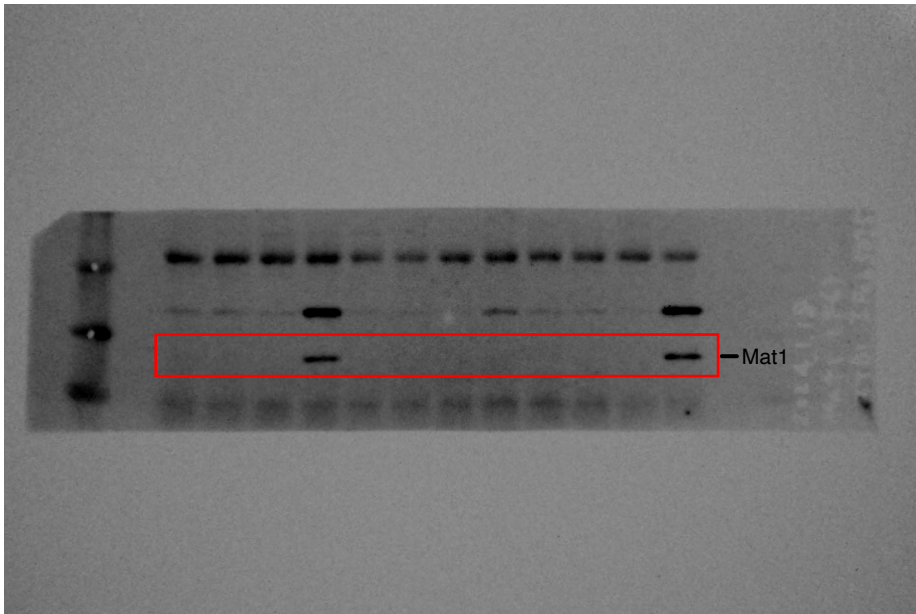

| input  |     |        |     |        |     |         |     |        |     |                     |  |
|--------|-----|--------|-----|--------|-----|---------|-----|--------|-----|---------------------|--|
| 1BR    |     | TTD1BR |     |        |     | XP140BR |     |        |     |                     |  |
| NucCyt | chr | NucCyt | chr | NucCyt | chr | NucCyt  | chr | NucCyt | chr |                     |  |
| 0      | 20  | 0      | 20  | 0      | 20  | 0       | 20  | 0      | 20  | J/m <sup>2</sup> 1h |  |

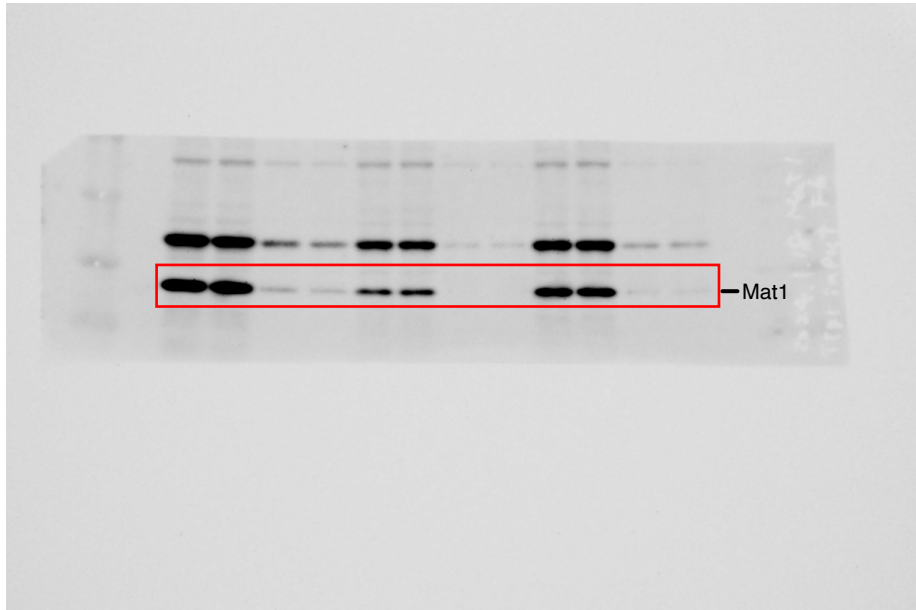

Fig3 e

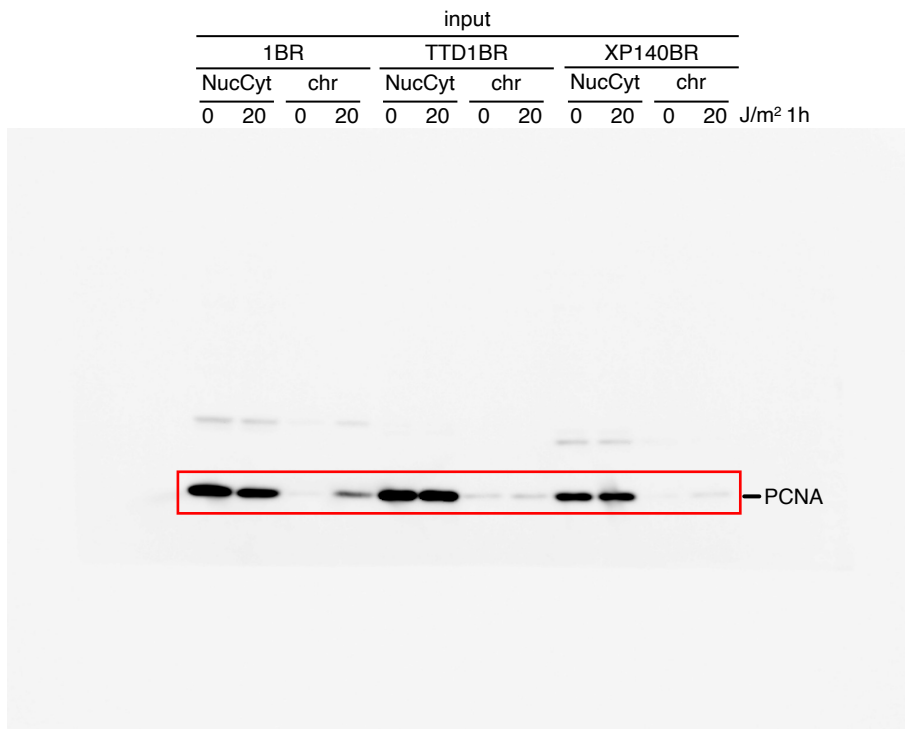

Fig4 b

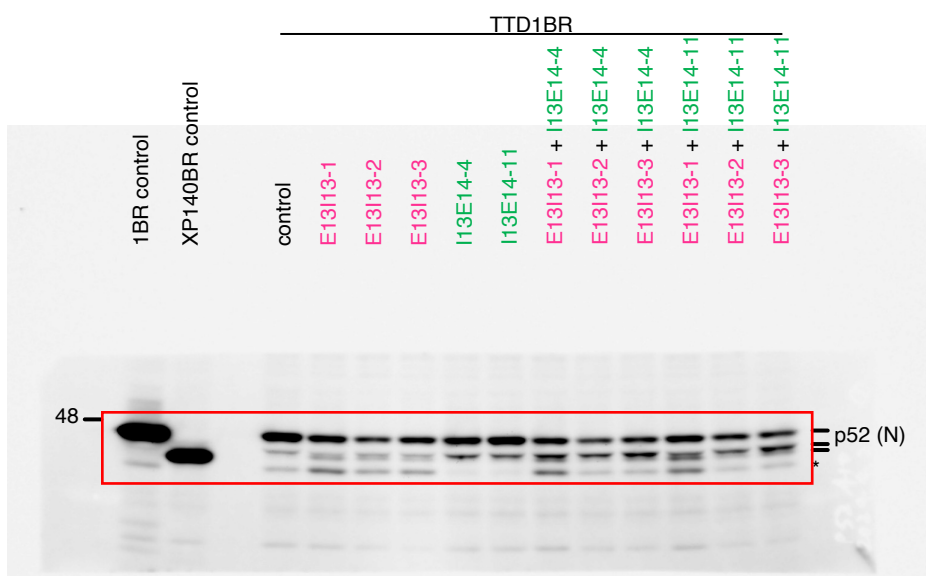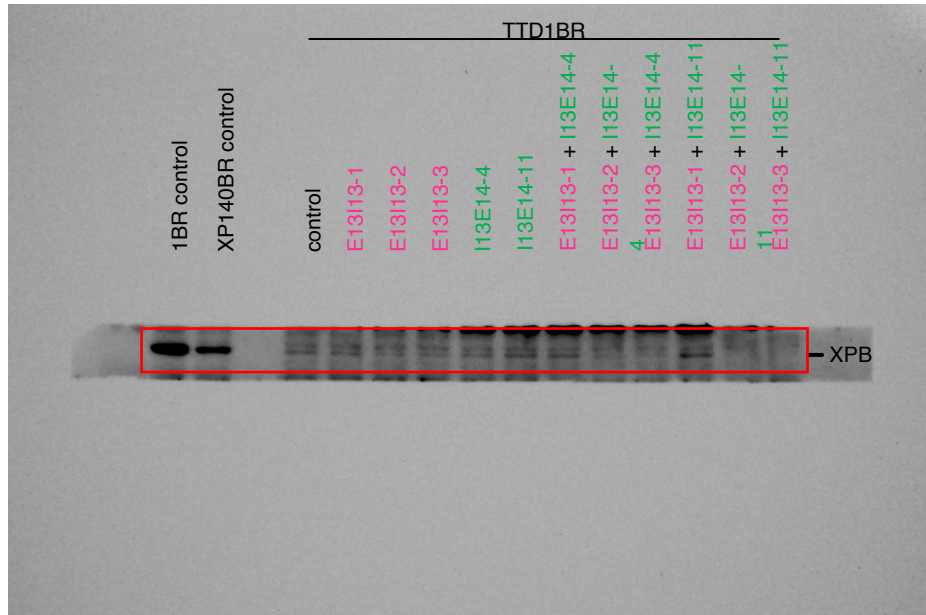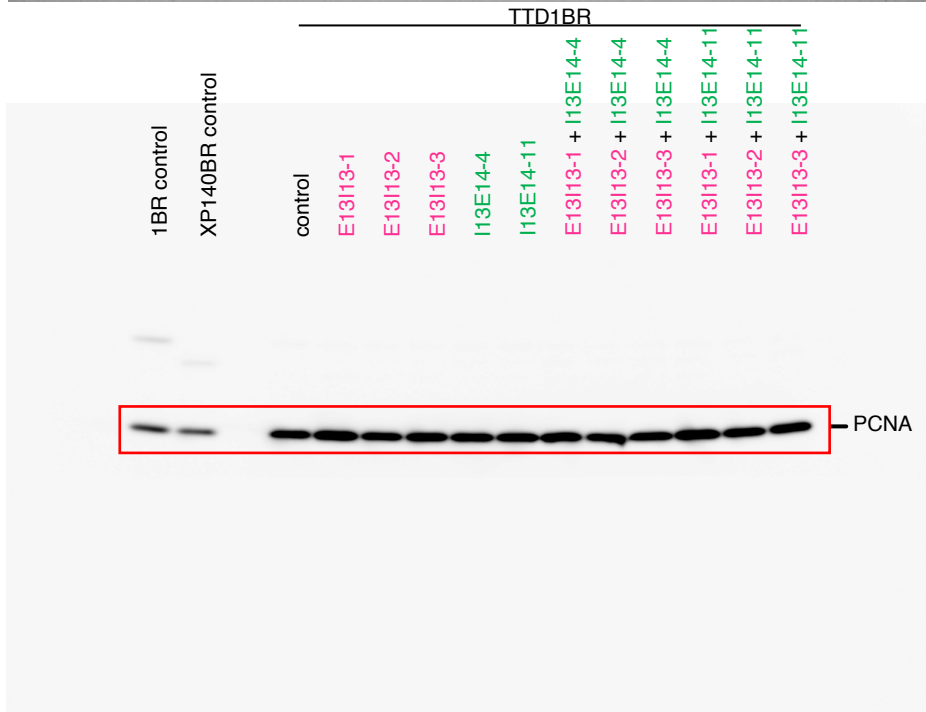

Fig4 c

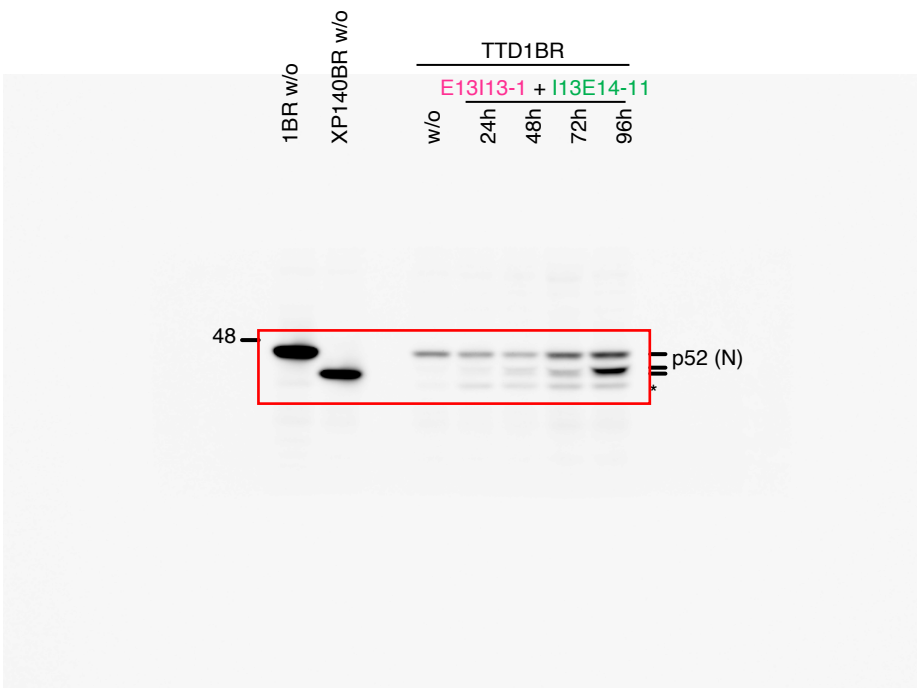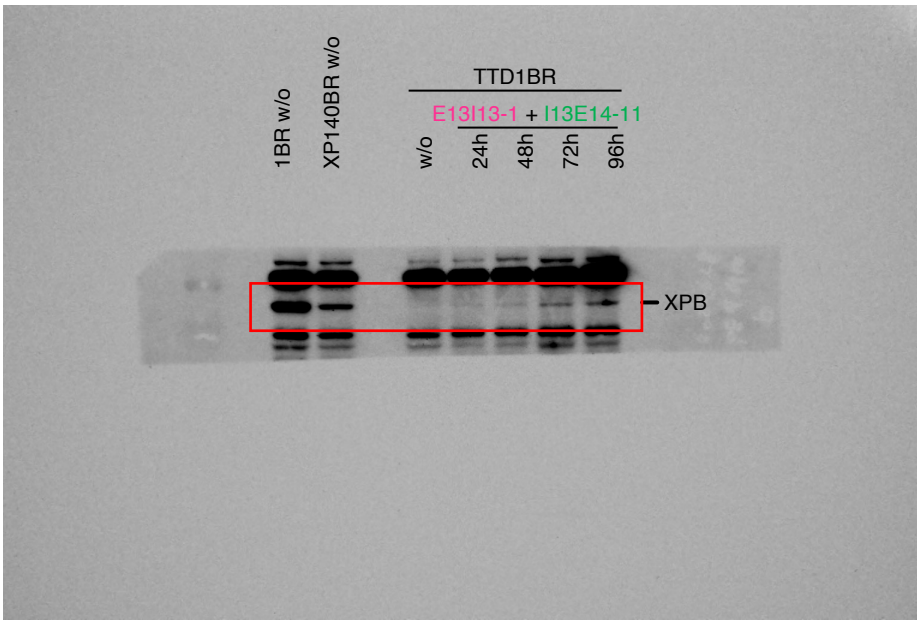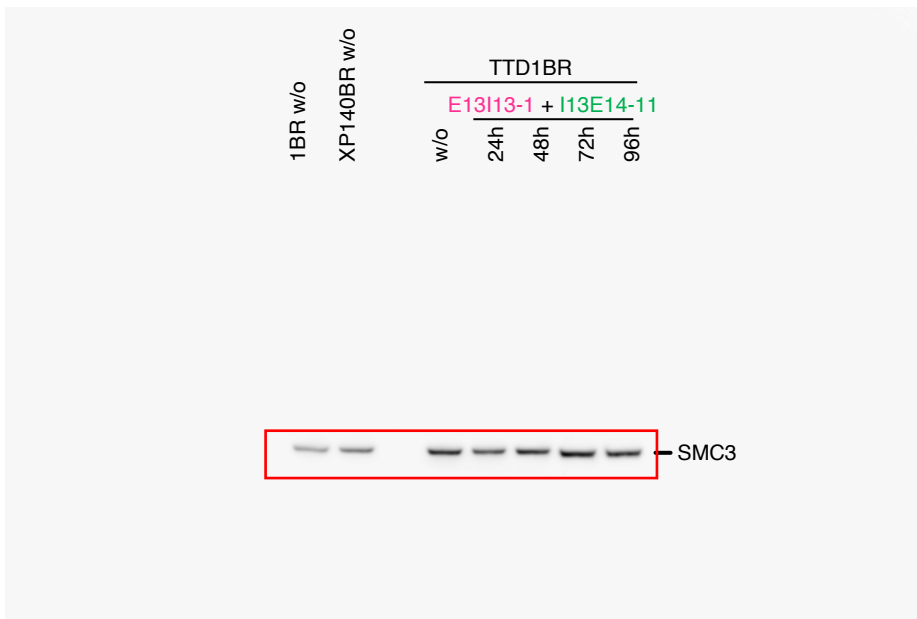

Fig4 d

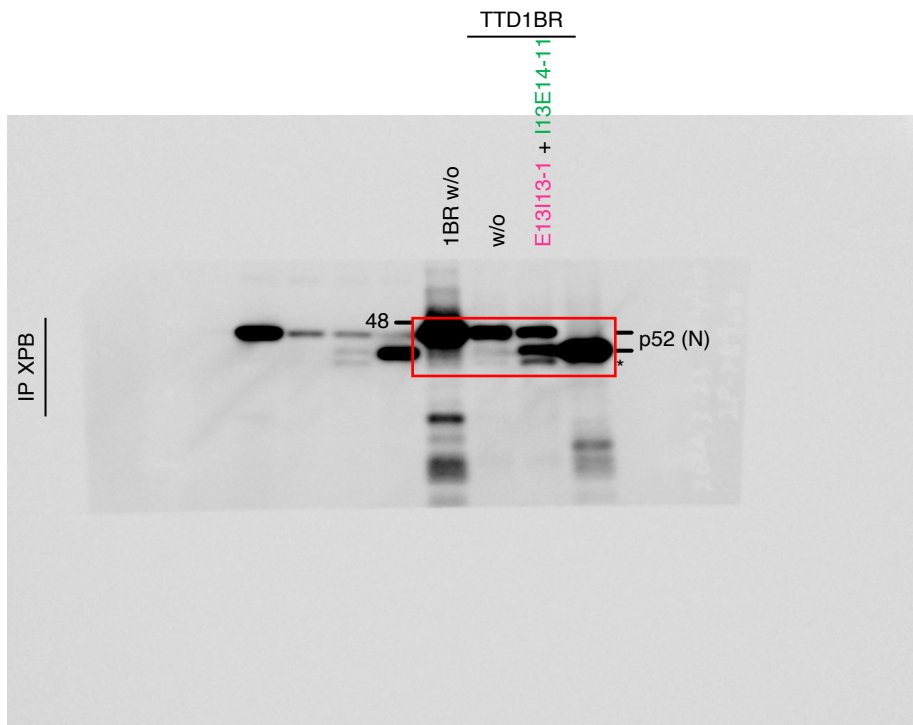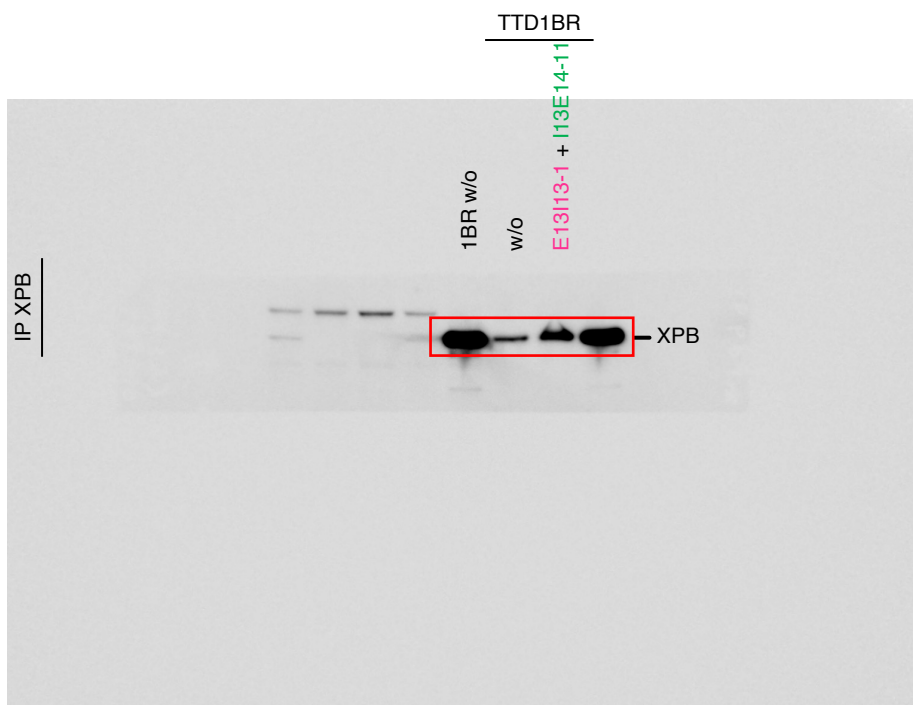

Fig4 d

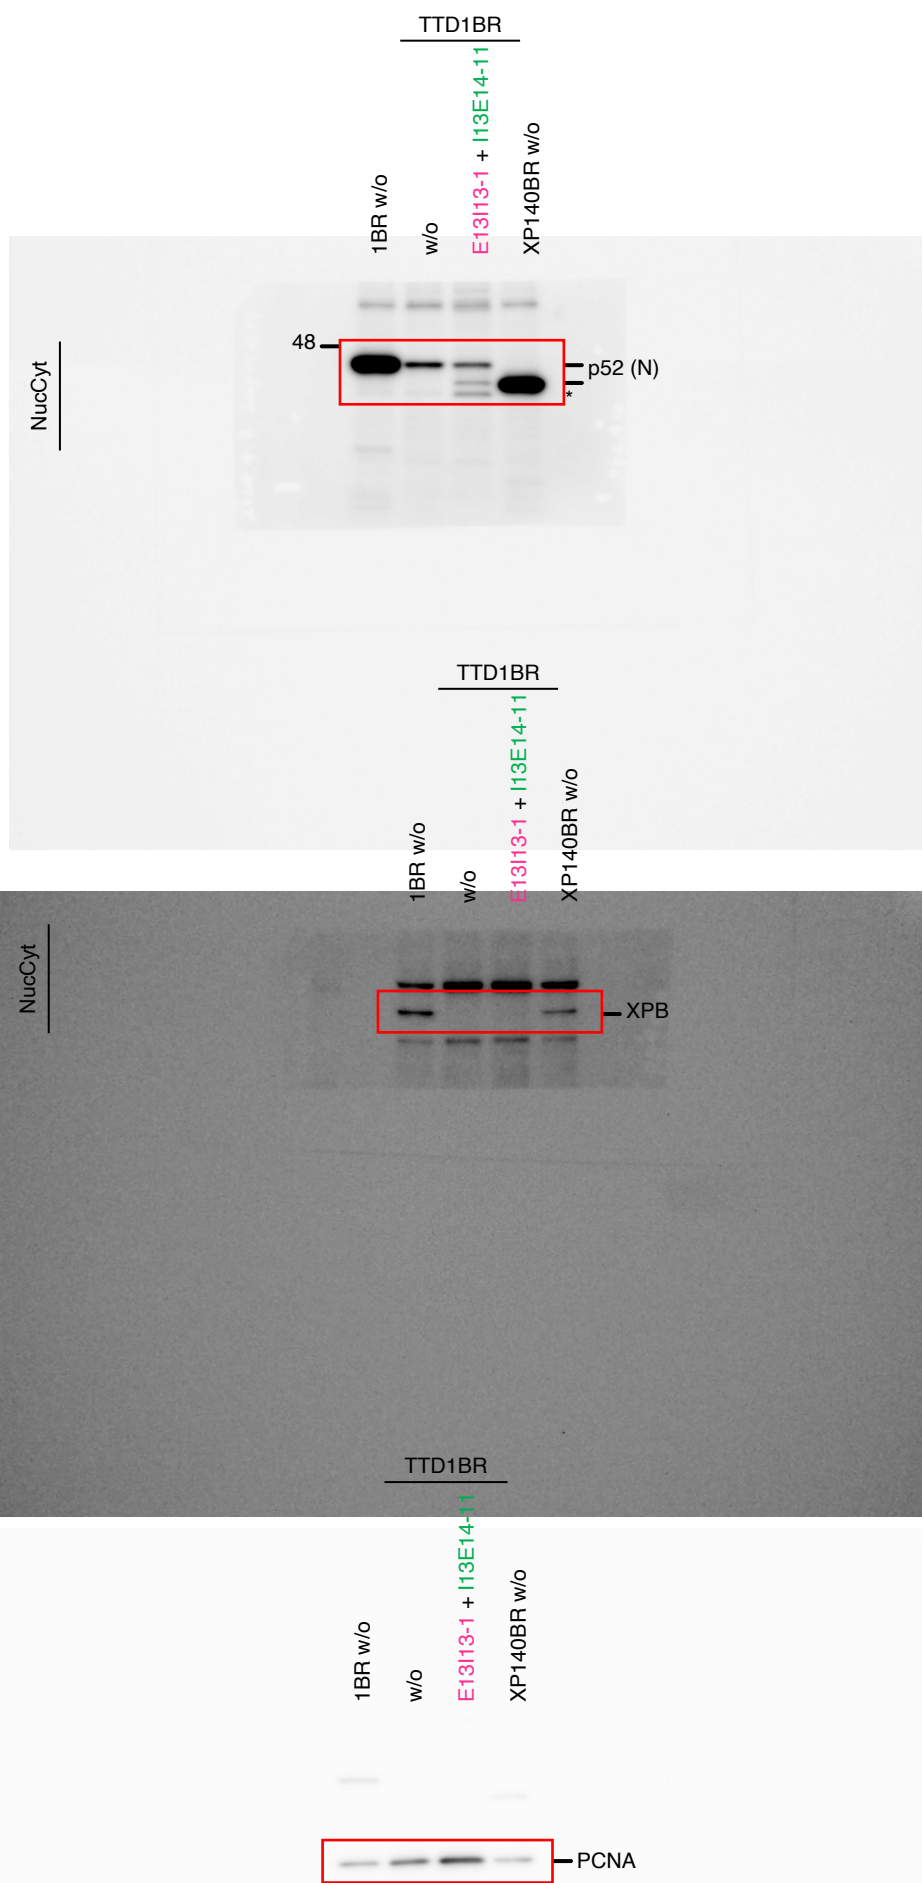

Supplement: sd1 [file 1]
